# Supplementary material for: A safe and compact flow platform for the neutralization of a mustard gas simulant with air and light
Source: Royal Society of Chemistry journal article supplement (doi:10.1039/d0gc01142h), 2020-01-01
Supplement: d0gc01142h1.pdf [file d0gc01142h1.pdf]

*Supporting Information for:*

**A safe and compact flow platform for the neutralization of a mustard gas simulant with air and light**

Noémie Emmanuel,<sup>a,¶</sup> Pauline Bianchi,<sup>a,¶</sup> Julien Legros<sup>b</sup> and Jean-Christophe M. Monbaliu<sup>a,\*</sup>

*a. Center for Integrated Technology and Organic Synthesis, MolSys Research Unit, University of Liège, B-4000 Liège (Sart Tilman), Belgium. [jc.monbaliu@uliege.be](mailto:jc.monbaliu@uliege.be)  
[www.citos.uliege.be](http://www.citos.uliege.be)*

*b. Normandie Université, INSA Rouen, UNIROUEN, CNRS COBRA laboratory (UMR 6014 & FR3038) 76000 Rouen (France)*

**Table of contents**

|                                                                                                   |    |
|---------------------------------------------------------------------------------------------------|----|
| 1. Continuous flow setups .....                                                                   | 3  |
| 1.1 Microfluidic setups and parts .....                                                           | 3  |
| 1.1.1 Pumps .....                                                                                 | 3  |
| 1.1.2 Gas module .....                                                                            | 3  |
| 1.1.3 Connectors, ferrules and mixers .....                                                       | 3  |
| 1.1.4 Check-valves .....                                                                          | 3  |
| 1.1.5 Back-pressure regulator .....                                                               | 3  |
| 1.1.6 Reactor setups .....                                                                        | 3  |
| 1.1.7 Thermoregulatory devices .....                                                              | 3  |
| 1.2 Part numbers & vendors .....                                                                  | 4  |
| 1.3 Detailed continuous flow setup .....                                                          | 5  |
| 2. Additional experimental details .....                                                          | 6  |
| 2.1 Chemicals .....                                                                               | 6  |
| 2.2 Additional experimental data .....                                                            | 7  |
| 2.2.1 Analytical methods .....                                                                    | 7  |
| 2.2.2 Representative GC results for <b>CEES</b> oxidation .....                                   | 8  |
| 2.2.3 Continuous flow procedure for the photooxidation of sulfides .....                          | 18 |
| 2.2.3.1 Continuous flow procedure for the photooxidation of 2-chloroethylethyl sulfide .....      | 18 |
| 2.2.3.2 Continuous flow procedure for the photooxidation of dipropyl sulfide <b>1a</b> .....      | 18 |
| 2.2.3.3 Continuous flow procedure for the photooxidation of benzyl methyl sulfide <b>1c</b> ..... | 18 |
| 2.2.3.4 Continuous flow procedure for the photooxidation of thioanisole <b>1d</b> .....           | 18 |
| 2.2.3.5 Continuous flow procedure for the photooxidation of diphenyl sulfide <b>1e</b> .....      | 19 |
| 2.2.3.6 Continuous flow procedure for the photooxidation of dibenzothiophene <b>1f</b> .....      | 19 |

|          |                                                                                                                         |    |
|----------|-------------------------------------------------------------------------------------------------------------------------|----|
| 2.2.3.7  | Continuous flow procedure for the photooxidation of diethyl sulfide.....                                                | 19 |
| 2.2.3.8  | Continuous flow procedure for the photooxidation of thiodipropionic acid .....                                          | 19 |
| 2.2.3.9  | Continuous flow procedure for the photooxidation of tetrahydrothiophene .....                                           | 19 |
| 2.2.3.10 | Continuous flow procedure for the photooxidation of dibenzyl sulfide .....                                              | 20 |
| 2.2.3.11 | Continuous flow procedure for the photooxidation of benzyl phenyl sulfide.....                                          | 20 |
| 2.2.3.12 | Continuous flow procedure for the photooxidation of 2-chloroethylphenyl sulfide ....                                    | 20 |
| 2.2.4    | Batch procedures for the synthesis of products and by-products resulting from 2-chloroethylethylsulfide oxidation ..... | 21 |
| 2.2.4.1  | Batch procedure for the synthesis of vinyl ethyl sulfoxide ( <b>EVSO, I-2</b> ) .....                                   | 21 |
| 2.2.4.2  | Batch procedure for the synthesis of 2-ethoxyethylethyl sulfane ( <b>I-1</b> ) .....                                    | 21 |
| 2.2.4.3  | Batch procedure for the synthesis of 1-ethoxy-2-(ethylsulfinyl)ethane ( <b>I-3</b> ) .....                              | 21 |
| 2.2.4.4  | Batch procedure for the synthesis of 1-ethoxy-2-(ethylsulfonyl)ethane .....                                             | 21 |
| 2.3      | Characterization of compounds .....                                                                                     | 22 |
| 2.3.1    | In-line NMR.....                                                                                                        | 22 |
| 2.3.2    | In-line IR.....                                                                                                         | 23 |
| 2.4      | Structural identity of compounds.....                                                                                   | 24 |
| 2.5      | Copies of NMR spectra .....                                                                                             | 26 |
| 3.       | Detailed data on the photooxidation trials .....                                                                        | 29 |
| 3.1      | Photo oxidation of model thioethers .....                                                                               | 29 |
| 3.2      | CEES photooxidation tests.....                                                                                          | 30 |
| 3.2.1    | Impact of the residence time.....                                                                                       | 30 |
| 3.2.2    | Comparison of oxygen and air .....                                                                                      | 30 |
| 3.2.3    | Comparison of photosensitizers .....                                                                                    | 31 |
| 3.2.4    | Comparison of light (wavelength and intensity).....                                                                     | 31 |
| 4.       | Computations .....                                                                                                      | 32 |
| 4.1      | Stationary points for compounds <b>CEES, HD</b> and <b>1a-f</b> .....                                                   | 32 |
| 4.2      | Selected transition states, peroxysulfoxides and sulfoxides .....                                                       | 35 |

## 1. **Continuous flow setups**

### 1.1 Microfluidic setups and parts

All microfluidic setups were assembled with commercially available parts.

#### 1.1.1 Pumps

ThalesNano microHPLC<sup>®</sup> pumps (wetted parts: SS 316, ruby and sapphire) were utilized to handle the liquid feeds.

#### 1.1.2 Gas module

The gas flow rate was controlled with a Bronkhorst<sup>®</sup> F210CTM mass flow controller (MFC).

#### 1.1.3 Connectors, ferrules and mixers

1/8" PFA tubings (Swagelok<sup>®</sup>) were equipped with Super Flangeless PEEK nuts, ETFE ferrules and SS rings. 1/4" PFA tubings (Swagelok<sup>®</sup>) were equipped with 1/4" PFA Swagelok Tube Fitting unions and elbows. Connectors, ferrules and unions were purchased from IDEX/Upchurch (details in Table S1).

#### 1.1.4 Check-valves

Check-valves (IDEX/Upchurch Scientific) were inserted between the pumps and the reactor.

#### 1.1.5 Back-pressure regulator

A dome-type BPR (Zaiput Flow Technologies, BPR-10) was inserted downstream. The dome-type BPR was connected to a compressed gas cylinder (air or nitrogen) to set the working pressure.

#### 1.1.6 Reactor setups

The flow reactor setups were manufactured by Corning SAS. The preliminary experiments relied on a Corning<sup>®</sup> Advanced-Flow<sup>™</sup> Lab Photo Reactor (1 fluidic module, 2.6 mL internal volume) and the final optimized setup relied on a Corning<sup>®</sup> Advanced-Flow<sup>™</sup> LF/G1 skid Photo Reactor (5 fluidic modules integrated with static mixers and connected in series, 13 mL total internal volume).

#### 1.1.7 Thermoregulatory devices

The reactor was maintained at reaction temperature with a LAUDA Integral XT 280 thermostat. The LED panels were maintained at 10 °C with a LAUDA RP845 (LAUDA Therm 180 silicone oil).

## 1.2 Part numbers & vendors

Standard fluidic elements and connectors were purchased from IDEX/Upchurch Scientific or from Swagelok (Table S1).

Table S1. Connectors, ferrules and unions

| Item          | Details                                                                   | Vendor                          | Reference      |
|---------------|---------------------------------------------------------------------------|---------------------------------|----------------|
| Connectors    | Super Flangeless™ Nut PEEK, 1/4-28 Flat-Bottom, for 1/8"                  | IDEX/<br>Upchurch<br>Scientific | P-331          |
|               | Super Flangeless™ Ferrule Tefzel™ (ETFE), 1/4-28 Flat-Bottom, for 1/8" OD | IDEX/<br>Upchurch<br>Scientific | P-359          |
|               | PFA Swagelok Tube Fitting, Union, 1/4 in. Tube Fitting                    | Swagelok                        | PFA-420-6      |
|               | PFA Swagelok Tube Fitting, Union Elbow, 1/4 in. Tube Fitting              | Swagelok                        | PFA-420-9      |
| Unions        | Large Bore Union PEEK for 3/16" OD                                        | IDEX/<br>Upchurch<br>Scientific | P-134          |
| Check-valve   | Check-valve inline cartridge 1.5 psi and cartridge holder, PEEK           | IDEX/<br>Upchurch<br>Scientific | CV-3000        |
| Dome-type BPR | Dome-type BPR, metal-free, with adjustable set point                      | Zaiput Flow Techn.              | BPR-10         |
| Tubing        | PFA Tubing, 1/8 in. OD x 0.030 in. wall x 100 feet                        | Swagelok                        | PFA-T2-030-100 |
|               | PFA Tubing, 1/4 in. OD x 0.047 in. wall x 100 feet                        | Swagelok                        | PFA-T4-047-100 |

### 1.3 Detailed continuous flow setup

Photooxidation of thioethers in a Corning® Advanced-Flow™ LF/G1 skid Photo Reactor. See manuscript for experimental details (Tables 2 and 3).

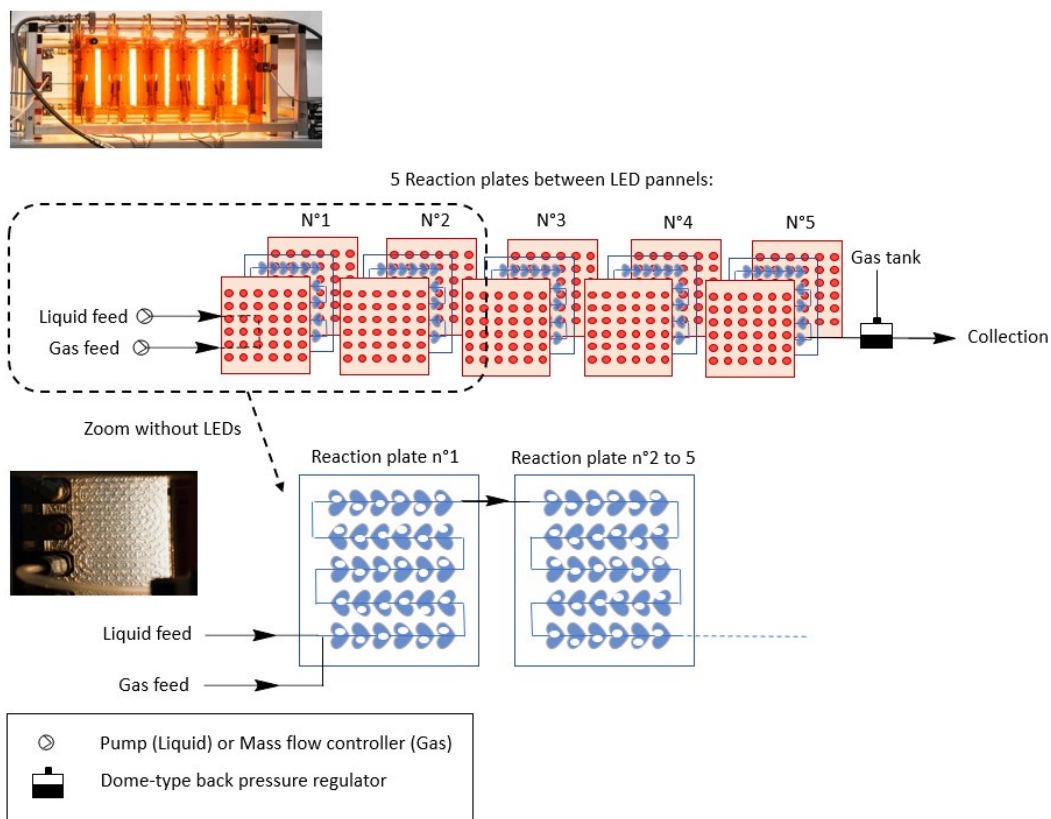

Figure S1. Detailed setup for the continuous flow photooxidation of sulfides.

## 2. Additional experimental details

### 2.1 Chemicals

Chemicals, purities, CAS numbers and suppliers are provided in Table S2.

Table S2. Solvents, chemicals and suppliers

| Solvents                                        | Purity (%)                               | CAS number         | Supplier      |
|-------------------------------------------------|------------------------------------------|--------------------|---------------|
| Ethanol                                         | 99                                       | 64-17-5            | VWR           |
| Acetonitrile                                    | ≥99.8                                    | 75-05-8            | VWR           |
| 2-Methyltetrahydrofuran                         | ≥99                                      | 96-47-9            | Merck         |
| Chemicals                                       | Purity (%)                               | CAS number         | Supplier      |
| Thioanisole (methyl phenyl sulfide)             | >99                                      | 100-68-5           | TCI           |
| Thioanisole sulfoxide (methyl phenyl sulfoxide) | >98                                      | 1193-82-4          | TCI           |
| Thioanisole sulfone (methyl phenyl sulfone)     | >97                                      | 3112-85-4          | TCI           |
| Dipropyl sulfide                                | >98                                      | 111-47-7           | TCI           |
| Dipropyl sulfone                                | >99                                      | 598-03-8           | TCI           |
| Thiodipropionic acid                            | >99                                      | 111-17-1           | TCI           |
| Benzyl sulfide                                  | >98                                      | 538-74-9           | TCI           |
| Benzyl sulfoxide                                | >98                                      | 621-08-9           | TCI           |
| Benzyl sulfone                                  | >98                                      | 620-32-6           | Alfa Aesar    |
| Diphenyl sulfide                                | >98                                      | 139-66-2           | TCI           |
| Diphenyl sulfoxide                              | >99                                      | 945-51-7           | TCI           |
| Diphenyl sulfone                                | >99                                      | 127-63-9           | TCI           |
| Tetrahydrothiophene sulfide                     | >99                                      | 110-01-0           | TCI           |
| Tetrahydrothiophene sulfoxide                   | >95                                      | 1600-44-8          | TCI           |
| Tetrahydrothiophene sulfone                     | >99                                      | 126-33-0           | TCI           |
| Benzyl phenyl sulfide                           | 98                                       | 831-91-4           | Alfa Aesar    |
| Diethyl sulfide                                 | >98                                      | 352-93-2           | TCI           |
| Benzyl methyl sulfide                           | >98                                      | 766-92-7           | TCI           |
| Benzyl methyl sulfone                           | >98                                      | 3112-90-1          | Alfa Aesar    |
| Dibenzothiophene sulfide                        | 98                                       | 132-65-0           | Alfa Aesar    |
| Dibenzothiophene sulfone                        | >98                                      | 1016-05-3          | TCI           |
| 2-Chloroethylethyl sulfide                      | >98                                      | 693-07-2           | TCI           |
| 2-Chloroethylethyl sulfone                      | 95                                       | 25027-40-1         | Sigma Aldrich |
| Ethyl vinyl sulfide                             | >93                                      | 627-50-9           | TCI           |
| Ethyl vinyl sulfone                             | 98                                       | 1889-59-4          | Sigma Aldrich |
| Methyl vinyl sulfone                            | 95                                       | 3680-02-2          | Alfa Aesar    |
| 2-Chloroethylphenyl sulfide                     | >98                                      | 5535-49-9          | TCI           |
| 2-Chloroethylphenyl sulfone                     | 98                                       | 938-09-0           | abcr          |
| Phenyl vinyl sulfone                            | 99                                       | 5535-48-8          | Sigma Aldrich |
| Gas                                             | Purity (%)                               | Ref                | Supplier      |
| Alphagaz 1 Oxygen                               | O <sub>2</sub> ≥ 99.995                  | P0361L50S2A<br>001 | Air Liquide   |
| Alphagaz 1 Air                                  | N <sub>2</sub> + O <sub>2</sub> ≥ 99.999 | P0291L50S2A<br>001 | Air Liquide   |

## 2.2 Additional experimental data

### 2.2.1 Analytical methods

Conversions and selectivities were determined by GC-FID or by HPLC-DAD using the following methods:

**GC method:** The GC-FID oven program consisted of the following steps: a 3 min hold at 50 °C, a 20 °C min<sup>-1</sup> ramp to 250 °C, and a 2 min hold at 250 °C. The temperature of the injector was set at 250 °C and the temperature of the FID detector was set at 270 °C. Prior to analysis unless specified otherwise, the sample was homogenized, 50 µL of the sample was mixed with 1 mL of EtOH (denaturated with 5% MeOH) in a 1.5 mL Eppendorf® vial. Conversions and selectivities for compounds **1a** and **CEES** were determined using this method.

#### HPLC method:

Eluent:

A: Water + 0.1% CF<sub>3</sub>COOH (v:v)

B: Acetonitrile

Gradient Table:

| Time (min) | A (%) | B (%) |
|------------|-------|-------|
| 0          | 100   | 0     |
| 20         | 20    | 80    |
| 23         | 20    | 80    |
| 25         | 100   | 0     |
| 31         | 100   | 0     |

Flow: 1 mL min<sup>-1</sup>

Injection Volume: 10 µL

Column: C18, 100 × 4.6 mm, 3 µm

Oven Temperature: 40 °C

Diode Array Detector: 180-800 nm (processed at 240 nm)

Conversions and selectivities for compounds **1c**, **1d**, **1e** and **1f** were determined using this method.

2.2.2 Representative GC results for **CEES** oxidation  
 GC chromatogram – see manuscript: Table 3, Entry 1

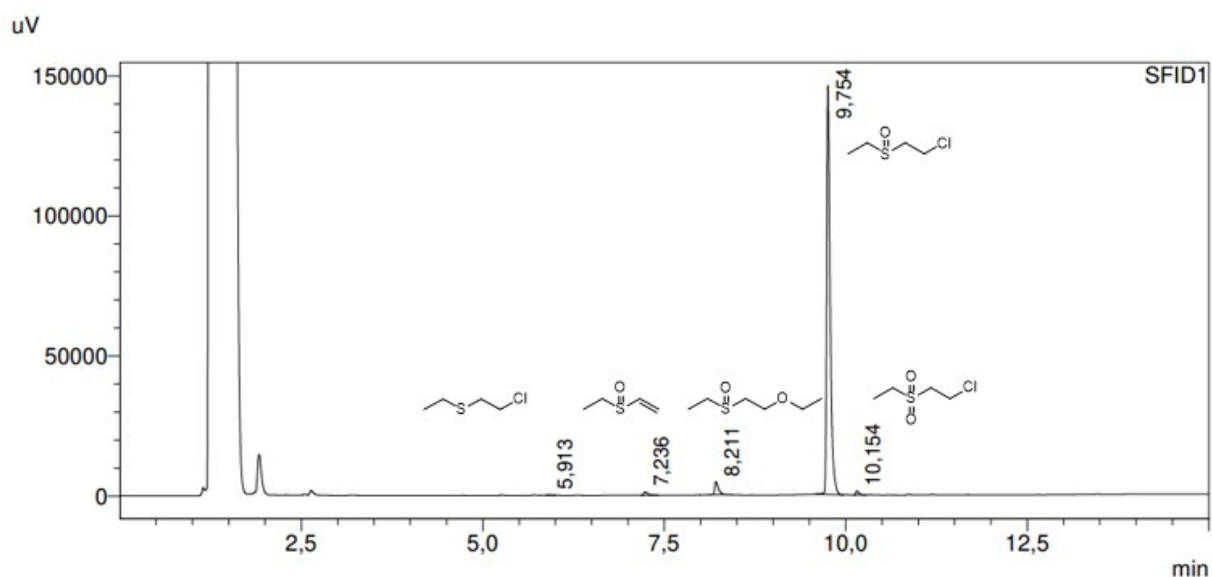

Figure S2. GC chromatogram of the oxidation of **CEES**. See manuscript for experimental details (Table 3, Entry 1).

|                          | Ret. time (min) | Conversion (%) |
|--------------------------|-----------------|----------------|
| <b>CEES</b>              | 5.9             | 0.10           |
| <b>EVSO (I-2)</b>        | 7.2             | 0.94           |
| <b>I-3</b>               | 8.2             | 3.39           |
| <b>CEESO</b>             | 9.75            | 94.70          |
| <b>CEESO<sub>2</sub></b> | 10.15           | 0.85           |

Conversion 99.92%

Selectivity for **CEESO** = 94.8%



GC chromatogram – see manuscript: Table 3, Entry 6

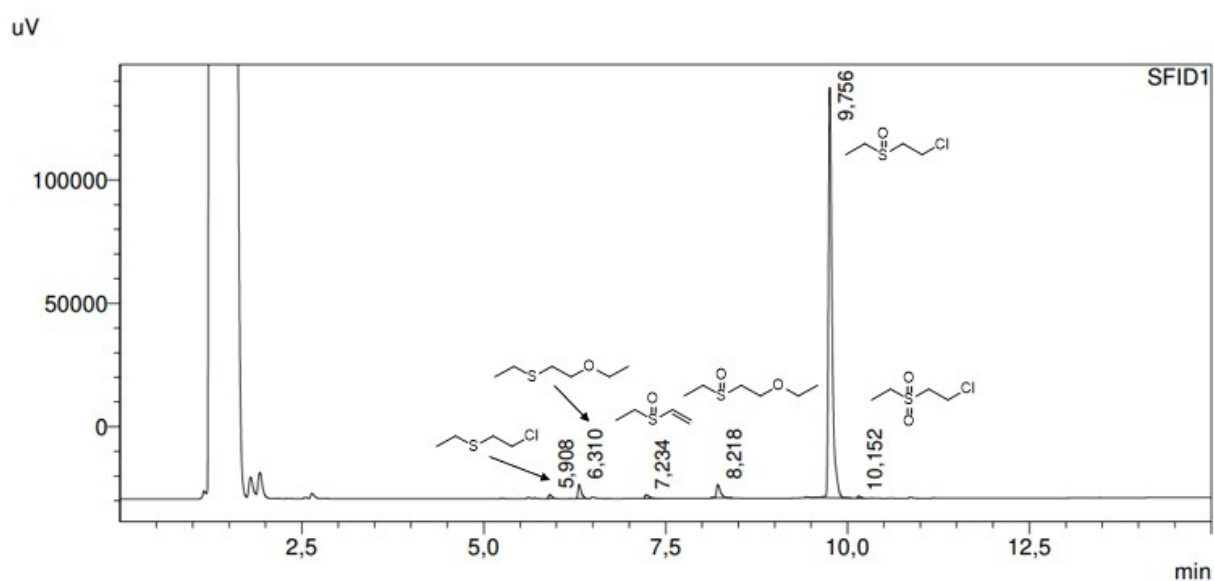

Figure S3. GC chromatogram of the oxidation of **CEES**. See manuscript for experimental details (Table 3, Entry 6).

|                          | Ret. time (min) | Conversion (%) |
|--------------------------|-----------------|----------------|
| <b>CEES</b>              | 5.9             | 0.79           |
| <b>I-1</b>               | 6.3             | 2.79           |
| <b>EVSO (I-2)</b>        | 7.2             | 0.95           |
| <b>I-3</b>               | 8.2             | 3.36           |
| <b>CEESO</b>             | 9.75            | 91.69          |
| <b>CEESO<sub>2</sub></b> | 10.15           | 0.43           |

Conversion 99.26%

Selectivity for **CEESO** = 92.4%

GC chromatogram – see manuscript: Table 3, Entry 4

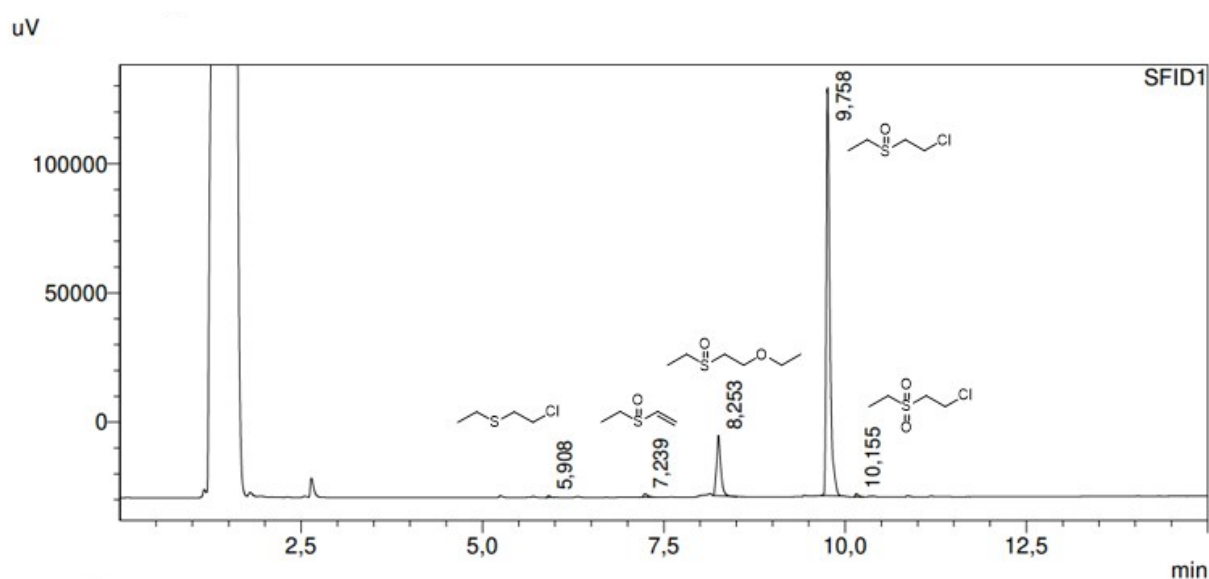

Figure S4. GC chromatogram of the oxidation of **CEES**. See manuscript for experimental details (Table 3, Entry 4).

|                          | Ret. time (min) | Conversion (%) |
|--------------------------|-----------------|----------------|
| <b>CEES</b>              | 5.9             | 0.27           |
| <b>EVSO (I-2)</b>        | 7.2             | 0.79           |
| <b>I-3</b>               | 8.2             | 14.56          |
| <b>CEESO</b>             | 9.75            | 83.81          |
| <b>CEESO<sub>2</sub></b> | 10.15           | 0.57           |

Conversion 99.74%

Selectivity for **CEESO** = 84.0%

GC chromatogram – see manuscript: Table 3, Entry 5

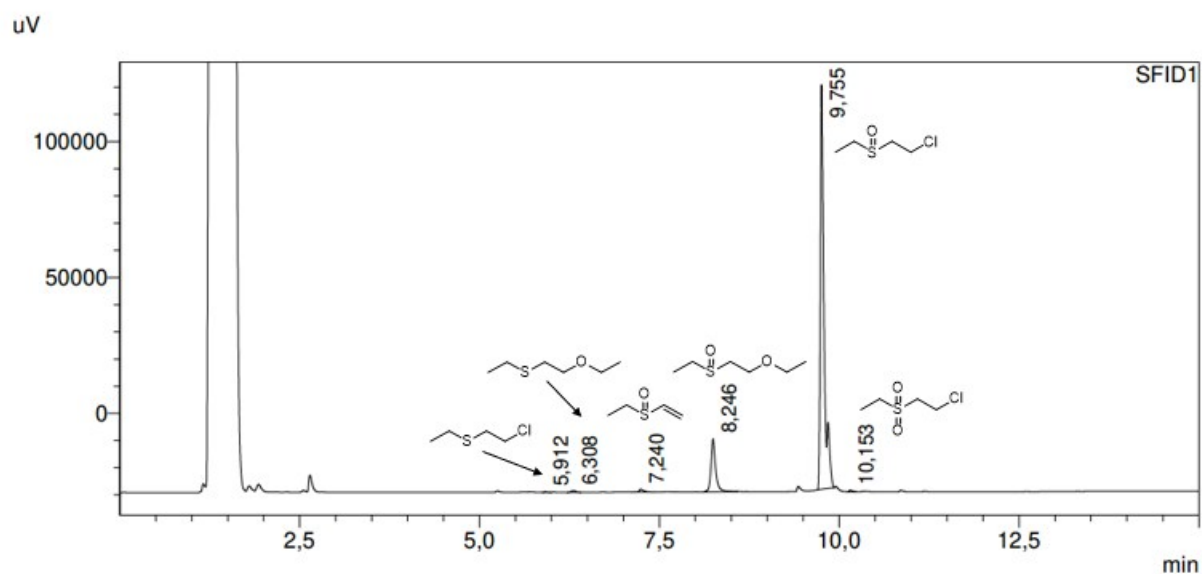

Figure S5. GC chromatogram of the oxidation of **CEES**. See manuscript for experimental details (Table 3, Entry 5).

|                          | Ret. time (min) | Conversion (%) |
|--------------------------|-----------------|----------------|
| <b>CEES</b>              | 5.9             | 0.13           |
| <b>I-1</b>               | 6.3             | 0.43           |
| <b>EVSO (I-2)</b>        | 7.2             | 0.76           |
| <b>I-3</b>               | 8.2             | 13.71          |
| <b>CEESO</b>             | 9.75            | 84.71          |
| <b>CEESO<sub>2</sub></b> | 10.15           | 0.27           |

Conversion 99.88%

Selectivity for **CEESO** = 84.8%

GC chromatogram – see manuscript: Table 3, Entry 2

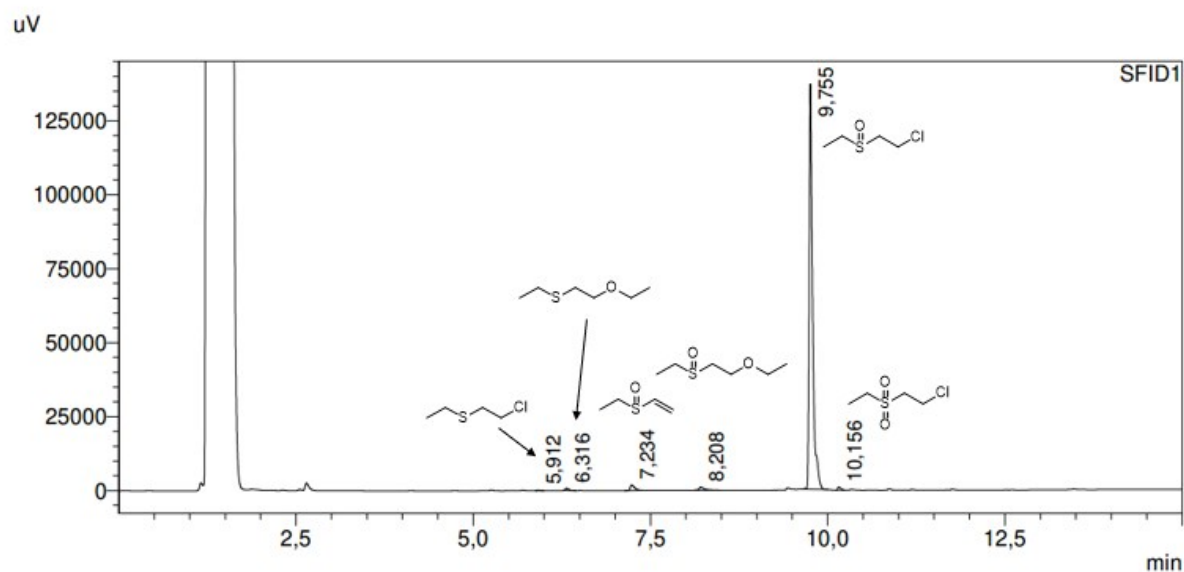

Figure S6. GC chromatogram of the oxidation of **CEES**. See manuscript for experimental details (Table 3, Entry 2).

|                          | Ret. time (min) | Conversion (%) |
|--------------------------|-----------------|----------------|
| <b>CEES</b>              | 5.9             | 0.12           |
| <b>I-1</b>               | 6.3             | 0.49           |
| <b>EVSO (I-2)</b>        | 7.2             | 1.58           |
| <b>I-3</b>               | 8.2             | 1.26           |
| <b>CEESO</b>             | 9.75            | 95.94          |
| <b>CEESO<sub>2</sub></b> | 10.15           | 0.60           |

Conversion 99.91%

Selectivity for **CEESO** = 96.1%

GC chromatogram – see manuscript: Table 3, Entry 3

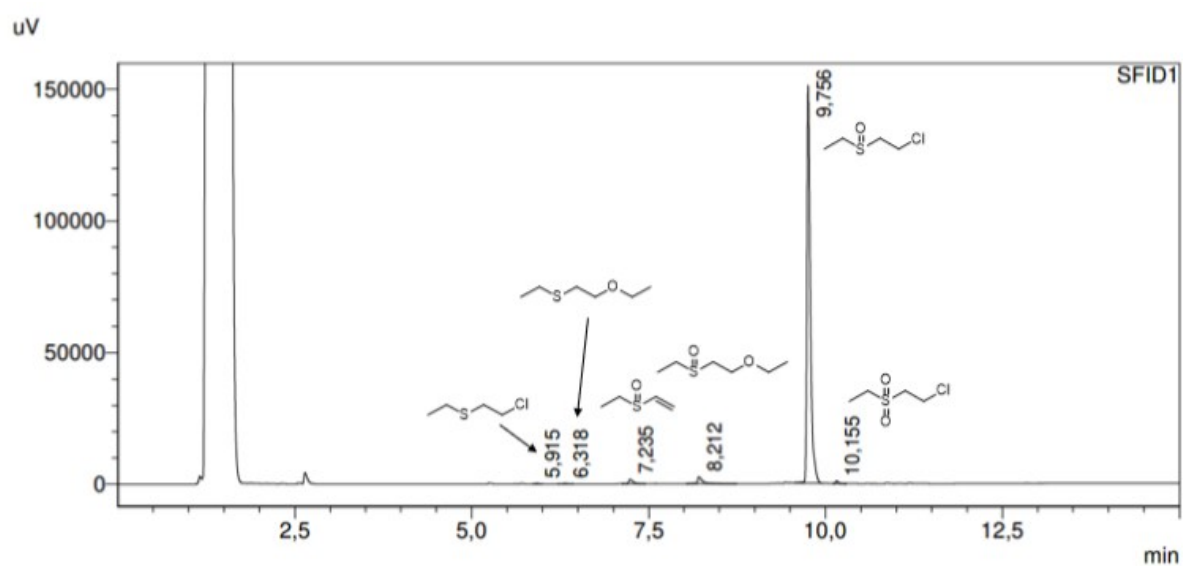

Figure S7. GC chromatogram of the oxidation of **CEES**. See manuscript for experimental details (Table 3, Entry 3).

|                          | Ret. time (min) | Conversion (%) |
|--------------------------|-----------------|----------------|
| <b>CEES</b>              | 5.9             | 0.10           |
| <b>I-1</b>               | 6.3             | 0.12           |
| <b>EVSO (I-2)</b>        | 7.2             | 1.41           |
| <b>I-3</b>               | 8.2             | 2.51           |
| <b>CEESO</b>             | 9.75            | 95.30          |
| <b>CEESO<sub>2</sub></b> | 10.15           | 0.56           |

Conversion 99.92%

Selectivity for **CEESO** = 95.4%

GC chromatogram – see manuscript: Table 3, Entry 10

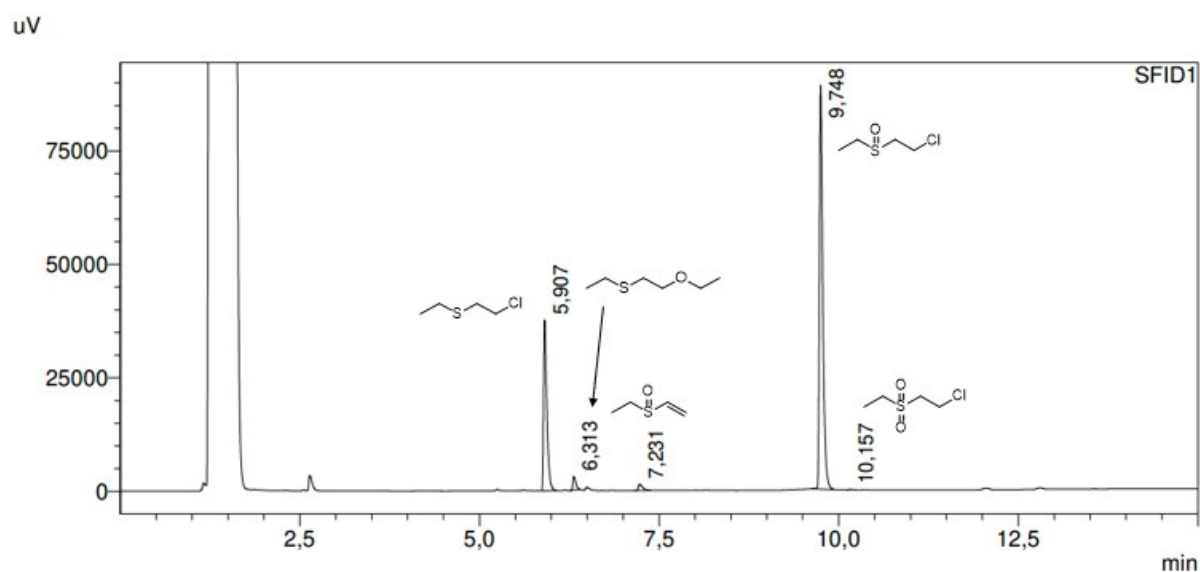

Figure S8. GC chromatogram of the oxidation of **CEES**. See manuscript for experimental details (Table 3, Entry 10).

|                          | Ret. time (min) | Conversion (%) |
|--------------------------|-----------------|----------------|
| <b>CEES</b>              | 5.9             | 28.15          |
| <b>I-1</b>               | 6.3             | 2.02           |
| <b>EVSO (I-2)</b>        | 7.2             | 1.28           |
| <b>CEESO</b>             | 9.75            | 68.47          |
| <b>CEESO<sub>2</sub></b> | 10.15           | 0.08           |

Conversion 81.88%

Selectivity for **CEESO** = 95.3%

GC chromatogram – see manuscript: Table 3, Entry 7

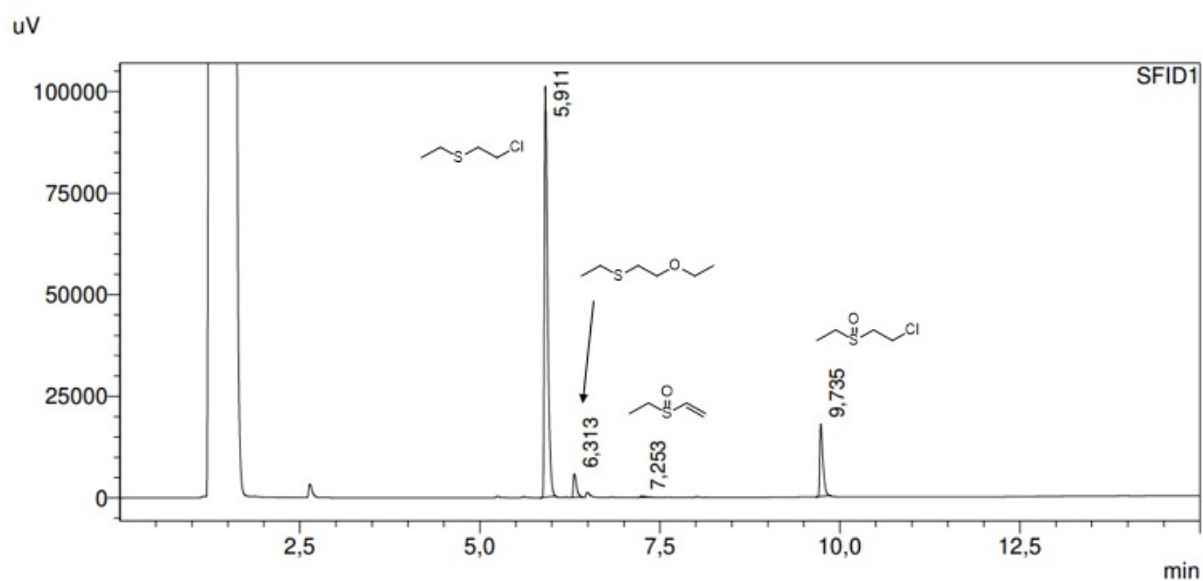

Figure S9. GC chromatogram of the oxidation of **CEES**. See manuscript for experimental details (Table 3, Entry 7).

|                   | Ret. time (min) | Conversion (%) |
|-------------------|-----------------|----------------|
| <b>CEES</b>       | 5.9             | 81.06          |
| <b>I-1</b>        | 6.3             | 4.48           |
| <b>EVSO (I-2)</b> | 7.2             | 0.44           |
| <b>CEESO</b>      | 9.75            | 14.02          |

Conversion 51.42%

Selectivity for **CEESO** = 74.0%

GC chromatogram – see manuscript: Table 3, Entry 8

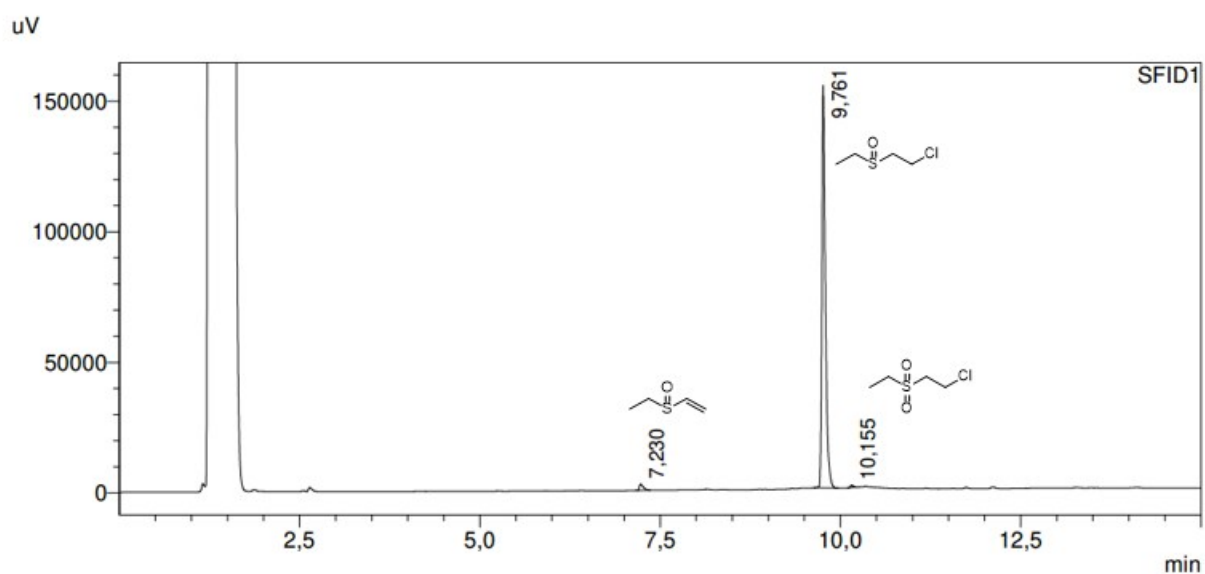

Figure S10. GC chromatogram of the oxidation of **CEES**. See manuscript for experimental details (Table 3, Entry 8).

|                          | Ret. time (min) | Conversion (%) |
|--------------------------|-----------------|----------------|
| <b>EVSO (I-2)</b>        | 7.2             | 1.68           |
| <b>CEESO</b>             | 9.75            | 97.79          |
| <b>CEESO<sub>2</sub></b> | 10.15           | 0.53           |

Conversion 100%

Selectivity for **CEESO** = 97.8%



GC chromatogram – See manuscript: Table 3, Entry 9

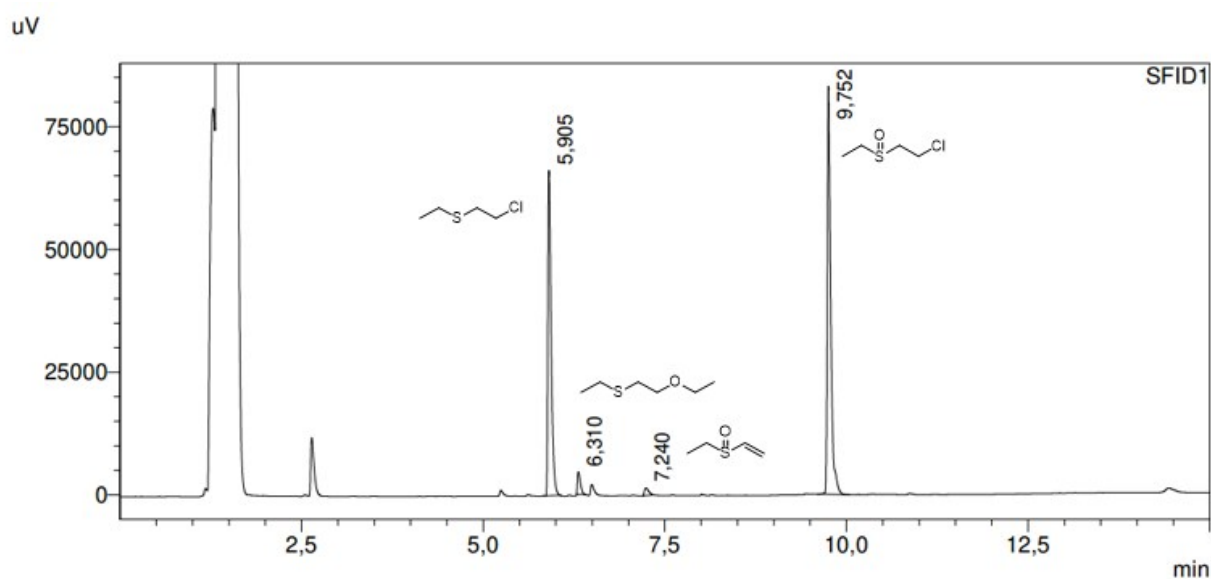

Figure S11. GC chromatogram of the oxidation of **CEES**. See manuscript for experimental details (Table 3, Entry 9).

|                   | Ret. time (min) | Conversion (%) |
|-------------------|-----------------|----------------|
| <b>CEES</b>       | 5.9             | 41.43          |
| <b>I-1</b>        | 6.3             | 2.56           |
| <b>EVSO (I-2)</b> | 7.2             | 1.27           |
| <b>CEESO</b>      | 9.75            | 54.74          |

Conversion 68.23%

Selectivity for **CEESO** = 93.5%

## 2.2.3 Continuous flow procedure for the photooxidation of sulfides

### 2.2.3.1 Continuous flow procedure for the photooxidation of 2-chloroethylethyl sulfide (**CEES**)

A solution of **CEES** (1 M) and MB (560  $\mu$ M) was prepared in EtOH. The pump used to deliver the solution of sulfide/catalyst and the gas flow meter used to deliver oxygen were set to 1 mL min<sup>-1</sup> and 20 mL<sub>N</sub> min<sup>-1</sup>, respectively. Both streams were mixed in the fluidic modules (5 x 2.6 mL internal volume, estimated 4 min residence time) at room temperature under 9 bar of counterpressure. White LEDs (4000K) were selected and used at 100% of their maximum intensity. The reactor effluent was collected at steady state, diluted with ethanol and analyzed by GC-FID (>99% conversion, 97.8% selectivity). Photooxidation of 2-chloroethylethyl sulfide with air was conducted following the same procedure with conditions described in Table 3 (>99% conversion, 84% selectivity).

### 2.2.3.2 Continuous flow procedure for the photooxidation of dipropyl sulfide **1a**

A solution of dipropyl sulfide (**1a**, 1 M) and MB (560  $\mu$ M) was prepared in EtOH. The pump used to deliver the solution of sulfide/catalyst and the gas flow meter used to deliver oxygen were set to 0.5 mL min<sup>-1</sup> and 10 mL<sub>N</sub> min<sup>-1</sup>, respectively. Both streams were mixed in the fluidic modules (5 x 2.6 mL internal volume, estimated 10 min residence time) at room temperature under 9 bar of counterpressure. Orange LEDs (610 nm) were selected and used at 70% of their maximum intensity. The reactor effluent was collected at steady state, diluted with ethanol and analyzed by GC-FID (>99% conversion, 97.2% selectivity).

### 2.2.3.3 Continuous flow procedure for the photooxidation of benzyl methyl sulfide **1c**

A solution of benzyl methyl sulfide (**1c**, 1 M) and MB (560  $\mu$ M) was prepared in EtOH. The pump used to deliver the solution of sulfide/catalyst and the gas flow meter used to deliver oxygen were set to 0.5 mL min<sup>-1</sup> and 10 mL<sub>N</sub> min<sup>-1</sup>, respectively. Both streams were mixed in the fluidic modules (5 x 2.6 mL internal volume, estimated 10 min residence time) at room temperature under 9 bar of counterpressure. Orange LEDs (610 nm) were selected and used at 70% of their maximum intensity. The reactor effluent was collected at steady state, diluted with ethanol and analyzed by HPLC-DAD (>99% conversion, >99% selectivity).

### 2.2.3.4 Continuous flow procedure for the photooxidation of thioanisole **1d**

A solution of thioanisole (**1d**, 1 M) and MB (560  $\mu$ M) was prepared in EtOH. The pump used to deliver the solution of sulfide/catalyst and the gas flow meter used to deliver oxygen were set to 0.5 mL min<sup>-1</sup> and 10 mL<sub>N</sub> min<sup>-1</sup>, respectively. Both streams were mixed in the fluidic modules (5 x 2.6 mL internal volume, estimated 10 min residence time) at room temperature under 9 bar of counterpressure. Orange LEDs (610 nm) were selected and used at 70% of their maximum intensity. The reactor effluent was collected at steady state, diluted with ethanol and analyzed by HPLC-DAD (>99% conversion, >99% selectivity).

#### 2.2.3.5 Continuous flow procedure for the photooxidation of diphenyl sulfide **1e**

A solution of diphenyl sulfide (**1e**, 0.1 M) and 9,10-dicyanoanthracene (56  $\mu\text{M}$ ) was prepared in MeCN. The pump used to deliver the solution of sulfide/catalyst and the gas flow meter used to deliver oxygen were set to  $0.5\text{ mL min}^{-1}$  and  $10\text{ mL}_\text{N min}^{-1}$ , respectively. Both streams were mixed in the fluidic modules (5 x 2.6 mL internal volume, estimated 10 min residence time) at room temperature under 9 bar of counterpressure. Purple LEDs (395 nm) were selected and used at 70% of their maximum intensity. The reactor effluent was collected at steady state, diluted with MeCN and analyzed by HPLC-DAD (46.6% conversion, >99% selectivity).

#### 2.2.3.6 Continuous flow procedure for the photooxidation of dibenzothiophene **1f**

A solution of dibenzothiophene (**1f**, 0.1 M) and 9,10-dicyanoanthracene (56  $\mu\text{M}$ ) was prepared in MeCN. The pump used to deliver the solution of sulfide/catalyst and the gas flow meter used to deliver oxygen were set to  $0.5\text{ mL min}^{-1}$  and  $10\text{ mL}_\text{N min}^{-1}$ , respectively. Both streams were mixed in the fluidic modules (5 x 2.6 mL internal volume, estimated 10 min residence time) at room temperature under 9 bar of counterpressure. Orange LEDs (610 nm) were selected and used at 70% of their maximum intensity. The reactor effluent was collected at steady state, diluted with MeCN and analyzed by HPLC-DAD (48.9% conversion, 20.3% selectivity).

#### 2.2.3.7 Continuous flow procedure for the photooxidation of diethyl sulfide

A solution of diethyl sulfide (1 M) and MB (560  $\mu\text{M}$ ) was prepared in EtOH. The pump used to deliver the solution of sulfide/catalyst and the gas flow meter used to deliver oxygen were set to  $0.5\text{ mL min}^{-1}$  and  $10\text{ mL}_\text{N min}^{-1}$ , respectively. Both streams were mixed in the fluidic modules (5 x 2.6 mL internal volume, estimated 10 min residence time) at room temperature under 9 bar of counterpressure. Orange LEDs (610 nm) were selected and used at 70% of their maximum intensity. The reactor effluent was collected at steady state, diluted with ethanol and analyzed by GC-FID (>99% conversion, 97.3% selectivity).

#### 2.2.3.8 Continuous flow procedure for the photooxidation of thiodipropionic acid

A solution of thiodipropionic acid (1 M) and MB (560  $\mu\text{M}$ ) was prepared in EtOH. The pump used to deliver the solution of sulfide/catalyst and the gas flow meter used to deliver oxygen were set to  $0.5\text{ mL min}^{-1}$  and  $10\text{ mL}_\text{N min}^{-1}$ , respectively. Both streams were mixed in the fluidic modules (5 x 2.6 mL internal volume, estimated 10 min residence time) at room temperature under 9 bar of counterpressure. Orange LEDs (610 nm) were selected and used at 70% of their maximum intensity. The reactor effluent was collected at steady state, diluted with ethanol and analyzed by NMR (>99% conversion, >99% selectivity).

#### 2.2.3.9 Continuous flow procedure for the photooxidation of tetrahydrothiophene

A solution of tetrahydrothiophene (1 M) and MB (560  $\mu\text{M}$ ) was prepared in EtOH. The pump used to deliver the solution of sulfide/catalyst and the gas flow meter used to deliver oxygen were set to  $0.5\text{ mL min}^{-1}$  and  $10\text{ mL}_\text{N min}^{-1}$ , respectively. Both streams were

mixed in the fluidic modules (5 x 2.6 mL internal volume, estimated 10 min residence time) at room temperature under 9 bar of counterpressure. Orange LEDs (610 nm) were selected and used at 70% of their maximum intensity. The reactor effluent was collected at steady state, diluted with ethanol and analyzed by GC-FID (>99% conversion, >99% selectivity).

#### 2.2.3.10 Continuous flow procedure for the photooxidation of dibenzyl sulfide

A solution of dibenzyl sulfide (0.1 M) and MB (560  $\mu$ M) was prepared in EtOH/2-MeTHF. The pumps used to deliver the solution of sulfide/catalyst and the gas flow meter used to deliver oxygen were set to 0.5 mL min<sup>-1</sup> and 10 mL<sub>N</sub> min<sup>-1</sup>, respectively. Both streams were mixed in the fluidic modules (5 x 2.6 mL internal volume, estimated 10 min residence time) at 60 °C under 9 bar of counterpressure. Orange LEDs (610 nm) were selected and used at 70% of their maximum intensity. The reactor effluent was collected at steady state, diluted with ethanol and analyzed by HPLC-DAD (>99% conversion, >63.9% selectivity).

#### 2.2.3.11 Continuous flow procedure for the photooxidation of benzyl phenyl sulfide

A solution of benzyl phenyl sulfide (1 M) and MB (560  $\mu$ M) was prepared in EtOH. The pump used to deliver the solution of sulfide/catalyst and the gas flow meter used to deliver oxygen were set to 0.1 mL min<sup>-1</sup> and 25 mL<sub>N</sub> min<sup>-1</sup>, respectively. Both streams were mixed in the fluidic modules (1 x 2.6 mL internal volume, estimated 1 min residence time) at room temperature under 9 bar of counterpressure. Orange LEDs (610 nm) were selected and used at 70% of their maximum intensity. The reactor effluent was collected at steady state, diluted with ethanol and analyzed by HPLC-DAD (13.1% conversion, 55.7% selectivity).

#### 2.2.3.12 Continuous flow procedure for the photooxidation of 2-chloroethylphenyl sulfide

A solution of 2-chloroethylphenyl sulfide (0.1 M) and MB (56  $\mu$ M) was prepared in EtOH. The pump used to deliver the solution of sulfide/catalyst and the gas flow meter used to deliver oxygen were set to 0.5 mL min<sup>-1</sup> and 10 mL<sub>N</sub> min<sup>-1</sup>, respectively. Both streams were mixed in the fluidic modules (5 x 2.6 mL internal volume, estimated 10 min residence time) at room temperature under 9 bar of counterpressure. Orange LEDs (610 nm) were selected and used at 70% of their maximum intensity. The reactor effluent was collected at steady state, diluted with ethanol and analyzed by GC-MS (>93.1% conversion, >99% selectivity).

#### 2.2.4 Batch procedures for the synthesis of products and by-products resulting from 2-chloroethylethylsulfide oxidation

##### 2.2.4.1 Batch procedure for the synthesis of vinyl ethyl sulfoxide (**EVSO**, **I-2**)

A solution of ethyl vinyl sulfide (1 M, 5 mL) was prepared in EtOH and oxidized with an aqueous solution of 30% H<sub>2</sub>O<sub>2</sub> (1 mL). An aliquot was taken after 5 min, diluted in EtOH, analyzed by GC-FID. Vinyl ethyl sulfoxide (**EVSO**) was detected alongside with vinyl ethyl sulfone (**EVSO<sub>2</sub>**) and identified by MS.

##### 2.2.4.2 Batch procedure for the synthesis of 2-ethoxyethylethyl sulfane (**I-1**)

A solution of 2-chloroethyl ethyl sulfide (1 M, 5 mL) was prepared in EtOH and heated in a microwave oven (CEM Discovery, 150 °C, 3 x 20 min, 150 W). An aliquot was diluted in EtOH, analyzed by GC-FID and identified by NMR and MS.

The formation of 2-ethoxyethylethyl sulfane (**I-1**) was also studied by leaving a solution of **CEES** (1 M) in EtOH for a week at room temperature without mixing. An aliquot was diluted in EtOH and analyzed by GC-FID over 4 days. From day 1 to day 4, the quantity of 2-ethoxyethylethylsulfane (**I-1**) increased from 1.19% to 4.03%. Even if **I-1** is detectable in GC when a fresh solution of **CEES** in EtOH is injected, this increase over time demonstrates that the formation of additional **I-1** occurs slowly upon standing in solution at room temperature.

##### 2.2.4.3 Batch procedure for the synthesis of 1-ethoxy-2-(ethylsulfinyl)ethane (**I-3**)

A solution of 2-ethoxyethylethyl sulfane (0.1 M, 2 mL) was prepared in EtOH and oxidized with an aqueous solution of 30% H<sub>2</sub>O<sub>2</sub> (0.3 mL). An aliquot was taken immediately, diluted in EtOH, analyzed by GC-FID. 1-Ethoxy-2-(ethylsulfinyl)ethane (**I-3**) was identified by MS.

**I-3** was not detected in GC when a solution of **EVSO** (**I-2**) in EtOH was injected; thus rejecting the filiation between **EVSO** and **I-3**.

##### 2.2.4.4 Batch procedure for the synthesis of 1-ethoxy-2-(ethylsulfonyl)ethane

A solution of 2-ethoxyethylethyl sulfane (0.1 M, 2 mL) was prepared in EtOH and oxidized with an aqueous solution of 30% H<sub>2</sub>O<sub>2</sub> (0.3 mL). An aliquot was taken after 5 min, diluted in EtOH, analyzed by GC-FID. 1-Ethoxy-2-(ethylsulfonyl)ethane was identified by MS.

## 2.3 Characterization of compounds

Commercial references for sulfoxides were purchased for **CEES**, **1d** and **1e** (see Table S2). For compounds **1a**, **1c** and **1f**, reference sulfoxides were synthesized by oxidation with  $\text{H}_2\text{O}_2$  for peak identification in HPLC or GC. Commercial references for sulfones were purchased for **CEES**, **1a**, **1c**, **1d**, **1e** and **1f** (see Table S2).

### 2.3.1 In-line NMR

A study of the evolution of **1d** oxidation regarding to an increase of light intensity was conducted. An In-line NMR was equipped downstream (43 MHz Spinsolve™ Carbon NMR spectrometer from Magritek® equipped with the flow-through module). A T-mixer was used to vent the excess gas before entering the NMR flow cell.

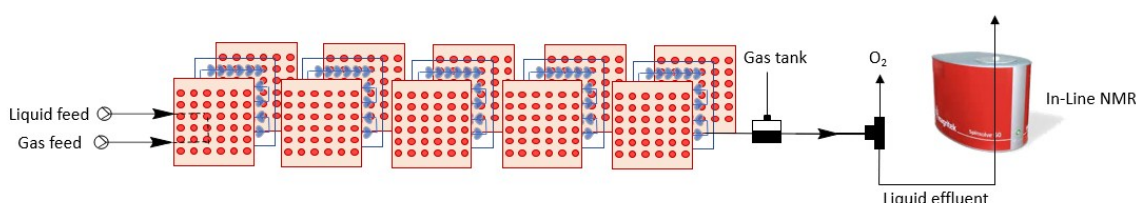

Figure S12. Detailed setup for the continuous flow photooxidation of sulfides.

A solution of **1d** (1 M) and MB (560  $\mu\text{M}$ ) was prepared in EtOH. The pumps used to deliver the solution of sulfide/catalyst and the gas flow meter used to deliver oxygen were set to  $0.5 \text{ mL min}^{-1}$  and  $10 \text{ mL}_\text{N} \text{ min}^{-1}$ , respectively. Both streams were mixed in the fluidic modules (5 x 2.6 mL internal volume, estimated 10 min residence time) at  $20^\circ\text{C}$  under 9 bar of counterpressure. LEDs were set on a 610 nm wavelength with an increasing intensity (from 0% to 100% with a 10% increment). A first  $^1\text{H}$  NMR spectrum was recorded for the solvent alone. When the reaction started, a  $^1\text{H}$  NMR spectrum was recorded after each increment of light intensity. The evolution of the oxidation can be studied by following the shift of the  $-\text{CH}_3$  signal from 2.42 ppm to 2.81 ppm. The reaction reached completion upon irradiation at 70% of light intensity (see Figure S13).

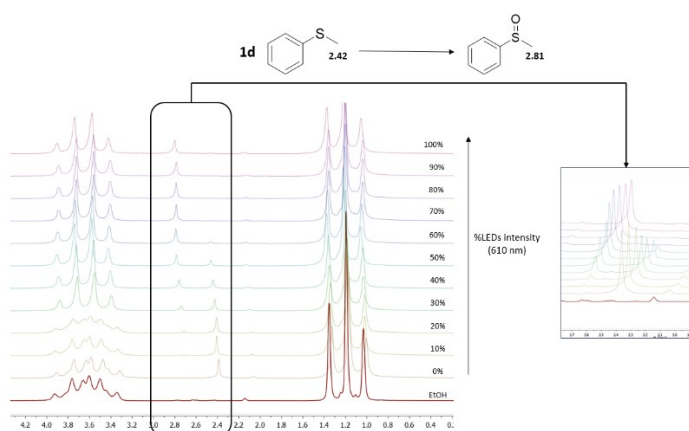

Figure S13. In-line  $^1\text{H}$  NMR (43 MHz) spectra of **1d** photooxidation. Evolution of the sulfoxide appearance with an increase of light intensity.

### 2.3.2 In-line IR

To assess the efficiency of the In-line IR as an analytical tool to follow the oxidation of **CEES**, a first set of experiments was carried out on **1a** as a model thioether (see Figure S14).

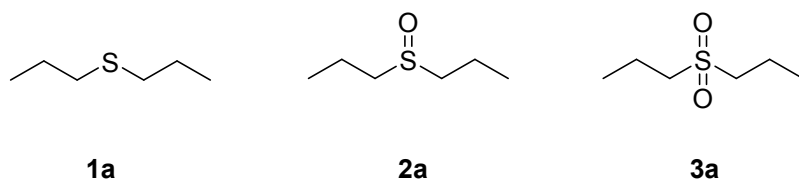

Figure S14. Structures of **1a**, **2a** and **3a**

A solution of dipropyl sulfide (**1a**, 1 M) was prepared in EtOH and injected first. Every 2 min, the amount of **1a** was reduced and the amount of dipropyl sulfoxide (**2a**) was increased to the point where the solution only contained the sulfoxide (1 M). The same procedure was applied with a decrease in sulfoxide and an increase in the corresponding sulfone **3a** until a concentration of 1 M was reached. Compound **1a** does not show any easily distinguishable signals from the solvent backbone and fingerprint. The corresponding sulfoxide **2a** shows a characteristic broad peak between 980 and 1020  $\text{cm}^{-1}$  that can be utilized to monitor the appearance of **2a**. The IR spectrum of dipropyl sulfone (**3a**) also displays characteristic vibration bands at 1130, 1280 and 1315  $\text{cm}^{-1}$  (see Figure S15) that can be utilized to monitor variations in its concentration.

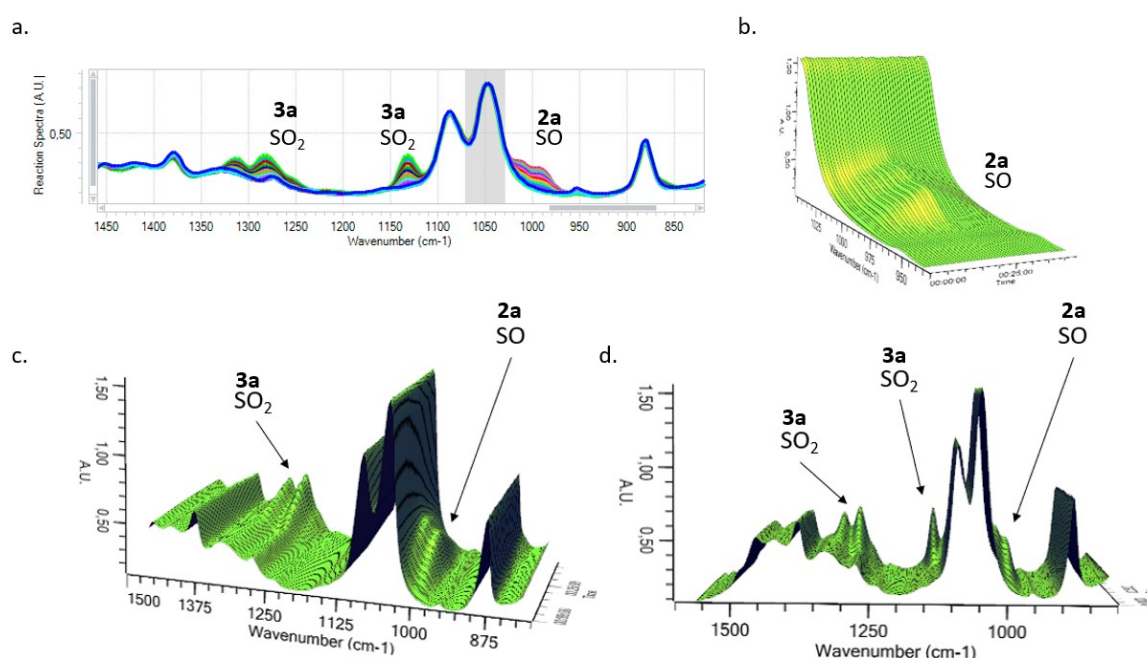

Figure S15. In-line IR spectra following **1a** oxidation to sulfoxide and overoxidation to sulfone.

The same procedure was applied to the oxidation of **CEES** for establishing a usable library of IR spectra. The characteristic vibration bands for the corresponding sulfoxide **CEESO** can be seen at 980 and 1020  $\text{cm}^{-1}$ , while the characteristic vibration bands for the sulfone **CEESO<sub>2</sub>** appear between 1220 and 1360  $\text{cm}^{-1}$  and at about 1730  $\text{cm}^{-1}$  (see Figure S16). These

experiments confirm that In-line IR can be used as a suitable monitoring tool for the monitoring of **CEES** oxidation.

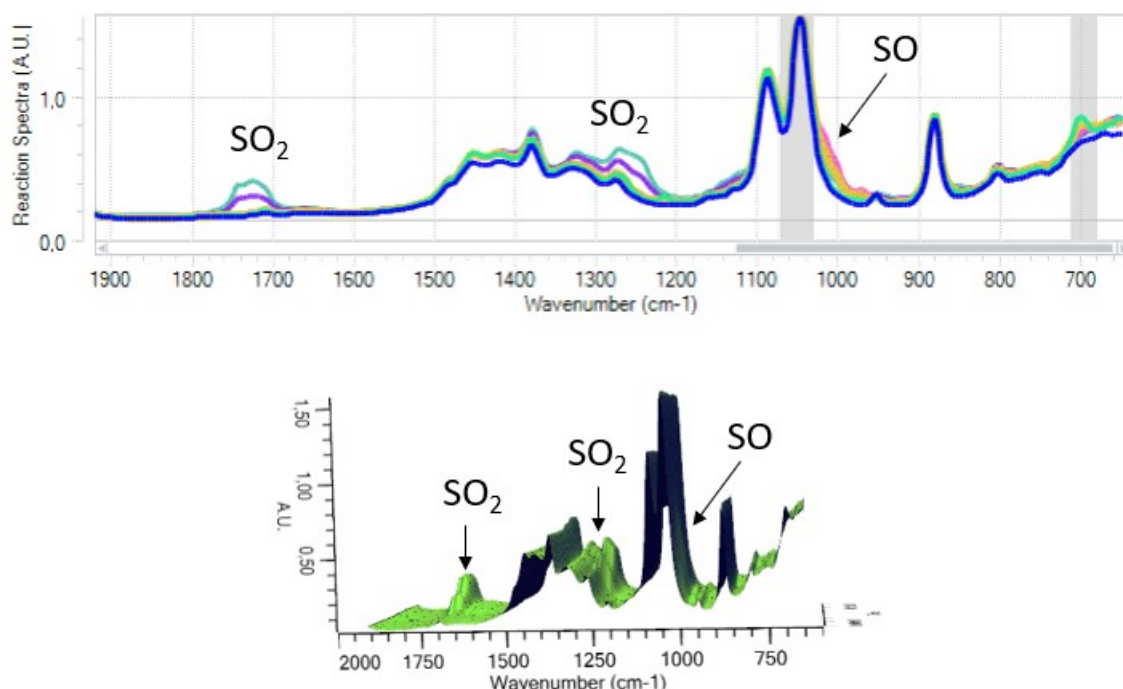

Figure S16. In-line IR spectra following **CEES** oxidation to sulfoxide and overoxidation to sulfone.

## 2.4 Structural identity of compounds

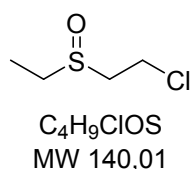

**CEESO**.  $^1\text{H}$  NMR ( $\text{CDCl}_3$ , 400 MHz):  $\delta$  = 3.96 (m, 2H), 3.21 (m, 2H), 2.91 (m, 2H), 1.37 (t,  $J$  = 7.5 Hz, 3H) ppm. The NMR data match those reported in the literature.<sup>S1</sup> **ESI HRMS**  $m/z$   $\text{C}_4\text{H}_{10}\text{O}^{35}\text{Cl}^{32}\text{S}^+$   $[\text{M}+\text{H}]^+$ : calcd 141.01354; found 141.01366.

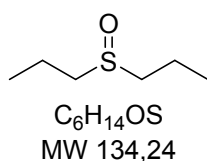

Dipropyl sulfoxide (**2a**).  $^1\text{H}$  NMR (MeOD, 400 MHz):  $\delta$  = 2.66 – 8.62 (m, 4H), 1.74 – 1.63 (m, 4H), 1.00 – 0.96 (t,  $J$  = 7.4 Hz, 6H) ppm. The NMR data match those reported in the literature.<sup>S2</sup>

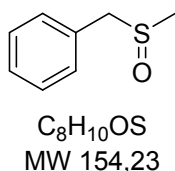

Benzyl methyl sulfoxide (**2c**).  $^1\text{H}$  NMR ( $\text{CDCl}_3$ , 400 MHz):  $\delta$  = 7.31 – 7.22 (m, 5H), 3.99 (d,  $J$  = 12.9 Hz, 1H), 3.92 (d,  $J$  = 12.9 Hz, 1H), 2.42 (s, 3H) ppm. The NMR data match those reported in the literature.<sup>S3</sup>

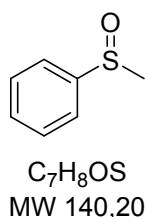

Phenyl methyl sulfoxide (**2d**).  $^1\text{H}$  NMR ( $\text{CDCl}_3$ , 43 MHz):  $\delta$  = 7.69 – 7.62 (m, 5H), 2.79 (s, 3H) ppm. The NMR data match the commercial reference and those reported in the literature.<sup>S4</sup>



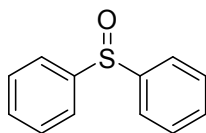

$C_{12}H_{10}OS$   
MW 202,27

Diphenyl sulfoxide (**2e**).  $^1H$  NMR ( $CDCl_3$ , 400 MHz):  $\delta$  = 7.54 – 7.51 (m, 4H), 7.35 – 7.34 (m, 6H) ppm. The NMR data match the commercial reference and those reported in the literature.<sup>S3</sup>

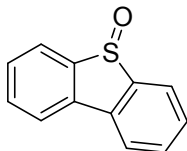

$C_{12}H_8OS$   
MW 200,26

Dibenzothiophene (**2f**).  $^1H$  NMR ( $CDCl_3$ , 400 MHz):  $\delta$  = 7.98 (d,  $J$  = 7.6 Hz, 2H), 7.81 (d,  $J$  = 7.6 Hz, 1H), 7.70 – 7.63 (m, 3H), 7.57 – 7.52 (m, 2H) ppm. The NMR data match those reported in the literature.<sup>S2</sup>

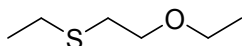

$C_6H_{14}OS$   
MW 134,24

2-ethoxyethylethyl sulfane (**I-1**).  $^1H$  NMR ( $CDCl_3$ , 400 MHz):  $\delta$  = 3.52 – 3.32 (m, 4H), 2.63 – 2.53 (m, 2H), 2.48 – 2.38 (m, 2H), 1.15 – 1.03 (m, 6H) ppm. GC-MS:  $m/z$  = 134

## 2.5 Copies of NMR spectra

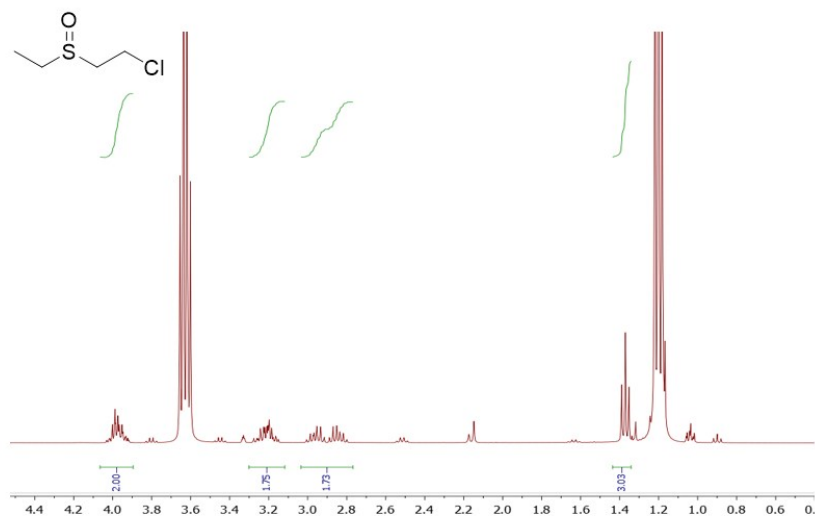

Figure S17.  $^1\text{H}$  NMR spectrum (400 MHz) of **CEESO** in  $\text{CDCl}_3$ .

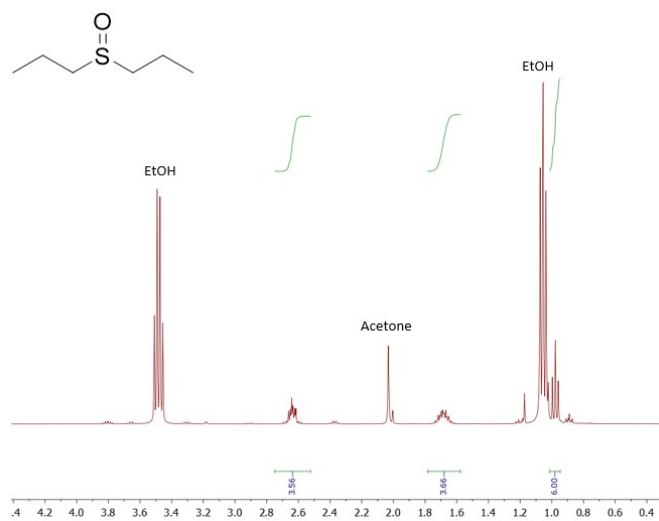

Figure S18.  $^1\text{H}$  NMR spectrum (400 MHz) of dipropyl sulfoxide (**2a**) in  $\text{CDCl}_3$ .

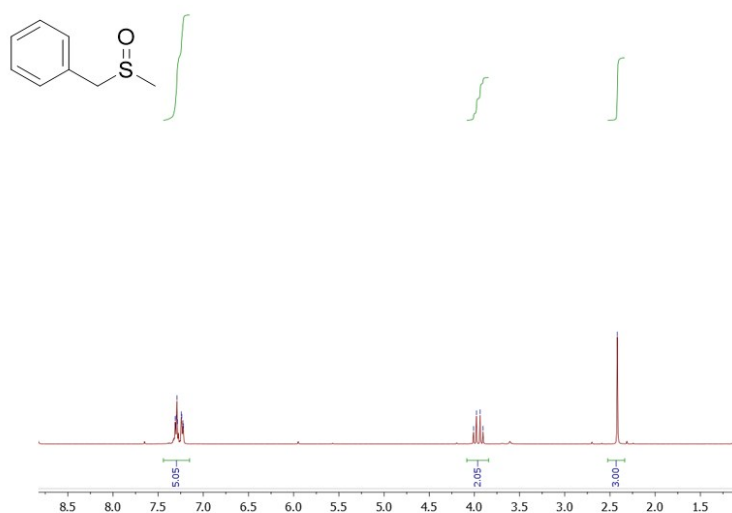

Figure S19. <sup>1</sup>H NMR spectrum (400 MHz) of benzyl methyl sulfoxide (**2c**) in CDCl<sub>3</sub>.

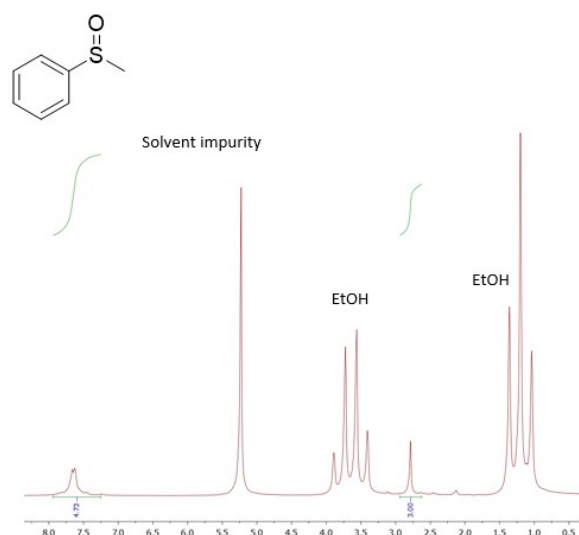

Figure S20. <sup>1</sup>H NMR spectrum (400 MHz) of phenyl methyl sulfoxide (**2d**) in CDCl<sub>3</sub>.

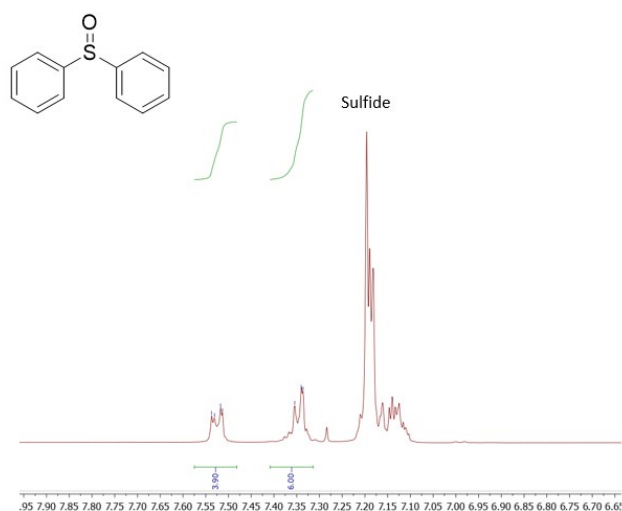

Figure S21.  $^1\text{H}$  NMR spectrum (400 MHz) of diphenyl sulfide (**2e**) in  $\text{CDCl}_3$ .

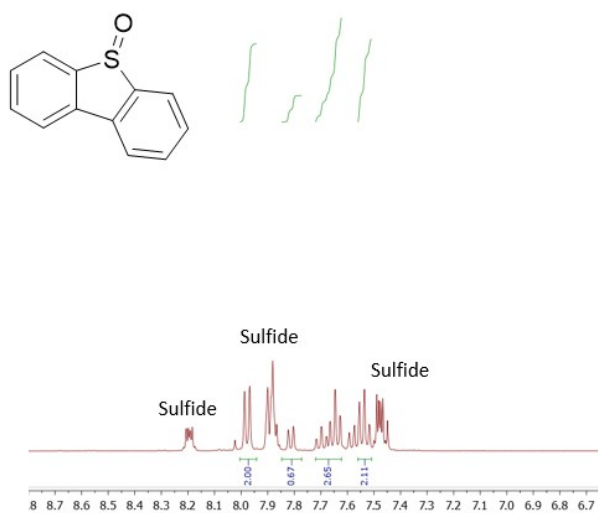

Figure S22.  $^1\text{H}$  NMR spectrum (400 MHz) of dibenzothiophene sulfoxide (**2f**) in  $\text{CDCl}_3$ .

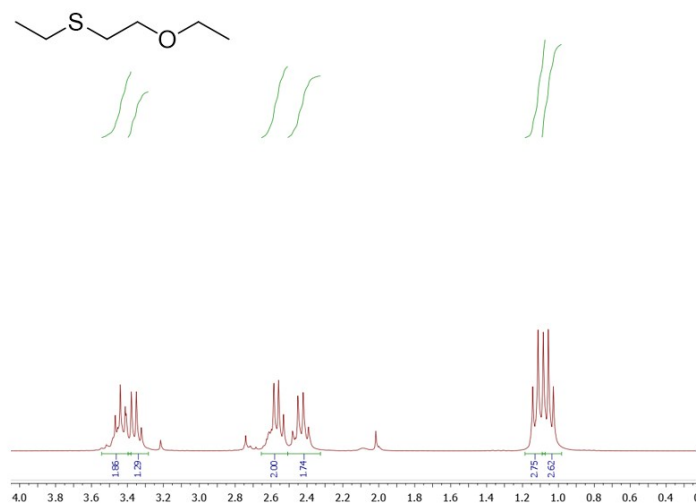

Figure S23.  $^1\text{H}$  NMR spectrum (400 MHz) of 2-ethoxyethylethyl sulfane (**I-1**) in  $\text{CDCl}_3$ .

### 3. Detailed data on the photooxidation trials

#### 3.1 Photooxidation of model thioethers

Table S3. General table of oxidation tests (part 1). Selectivity is only specified when not total towards the sulfoxide.

| n°exp | Substrate             | Oxidant        | Photosensib. | Solvent            | Temp. (°C) | Concentration (M) |              | Flow rate (mL.min <sup>-1</sup> ) |                | BPR (bar) | Light (nm) (Intensity (%)) | Res. Time (min) | Conversion (%)  | Selectivity (%) |
|-------|-----------------------|----------------|--------------|--------------------|------------|-------------------|--------------|-----------------------------------|----------------|-----------|----------------------------|-----------------|-----------------|-----------------|
|       |                       |                |              |                    |            | Substrate         | Photosensib. | Substrate                         | O <sub>2</sub> |           |                            |                 |                 |                 |
| 1     | thioanisole           | O <sub>2</sub> | MB           | EtOH               | rt         | 1                 | 0.00056      | 1.5                               | 15             | 8         | 610 (50)                   | -4              | 14.6            |                 |
| 2     | thioanisole           | O <sub>2</sub> | MB           | EtOH               | rt         | 1                 | 0.00056      | 1.5                               | 15             | 8         | 610 (50)                   | -4              | 14.4            |                 |
| 3     | thioanisole           | O <sub>2</sub> | MB           | EtOH               | rt         | 1                 | 0.00056      | 1.5                               | 15             | 8         | 610 (50)                   | -4              | 14.5            |                 |
| 4     | thioanisole           | O <sub>2</sub> | MB           | EtOH               | rt         | 1                 | 0.00056      | 2                                 | 15             | 8         | 610 (50)                   | -3              | 10.9            |                 |
| 5     | thioanisole           | O <sub>2</sub> | MB           | EtOH               | rt         | 1                 | 0.00056      | 2                                 | 15             | 8         | 610 (50)                   | -3              | 11.12           |                 |
| 6     | thioanisole           | O <sub>2</sub> | MB           | EtOH               | rt         | 1                 | 0.00056      | 2                                 | 15             | 8         | 610 (50)                   | -3              | 10.8            |                 |
| 7     | thioanisole           | O <sub>2</sub> | MB           | EtOH               | rt         | 1                 | 0.00056      | 20.2                              | 15             | 8         | 610 (100)                  | -3              | 27.3            |                 |
| 8     | thioanisole           | O <sub>2</sub> | MB           | EtOH               | rt         | 1                 | 0.00056      | 2.5                               | 15             | 8         | 610 (50)                   | -3              | 7.8             |                 |
| 9     | thioanisole           | O <sub>2</sub> | MB           | EtOH               | rt         | 1                 | 0.00056      | 3                                 | 15             | 8         | 610 (50)                   | -3              | 7.1             |                 |
| 10    | thioanisole           | O <sub>2</sub> | MB           | EtOH               | rt         | 1                 | 0.00056      | 3.5                               | 15             | 8         | 610 (50)                   | -3              | 6.3             |                 |
| 11    | thioanisole           | O <sub>2</sub> | MB           | EtOH               | rt         | 1                 | 0.00056      | 1.5                               | 15             | 8         | 610 (50)                   | -4              | 10.7            |                 |
| 12    | thioanisole           | O <sub>2</sub> | MB           | EtOH               | rt         | 1                 | 0.00056      | 2                                 | 15             | 8         | 610 (50)                   | -3              | 8.7             |                 |
| 13    | thioanisole           | O <sub>2</sub> | MB           | EtOH               | rt         | 1                 | 0.00056      | 2.5                               | 15             | 8         | 610 (50)                   | -3              | 6.7             |                 |
| 14    | thioanisole           | O <sub>2</sub> | MB           | EtOH               | rt         | 1                 | 0.00056      | 3                                 | 15             | 8         | 610 (50)                   | -3              | 7.2             |                 |
| 15    | thioanisole           | O <sub>2</sub> | MB           | EtOH               | rt         | 1                 | 0.00056      | 3.5                               | 15             | 8         | 610 (50)                   | -3              | 7.0             |                 |
| 16    | thioanisole           | O <sub>2</sub> | MB           | EtOH               | rt         | 1                 | 0.00056      | 1.5                               | 20             | 8         | 610 (50)                   | -3              | 0.14            |                 |
| 17    | thioanisole           | O <sub>2</sub> | MB           | EtOH               | rt         | 1                 | 0.00056      | 1.5                               | 25             | 8         | 610 (50)                   | -3              | 14.2            |                 |
| 18    | thioanisole           | O <sub>2</sub> | MB           | EtOH               | rt         | 1                 | 0.00056      | 1.5                               | 30             | 8         | 610 (50)                   | -3              | 10.9            |                 |
| 19    | thioanisole           | O <sub>2</sub> | MB           | EtOH               | rt         | 1                 | 0.00056      | 1.5                               | 35             | 8         | 610 (50)                   | -2              | 10.44           |                 |
| 20    | thioanisole           | O <sub>2</sub> | MB           | EtOH               | rt         | 1                 | 0.00056      | 2                                 | 20             | 8         | 610 (50)                   | -3              | 10.6            |                 |
| 21    | thioanisole           | O <sub>2</sub> | MB           | EtOH               | rt         | 1                 | 0.00056      | 2                                 | 25             | 8         | 610 (50)                   | -3              | 10.1            |                 |
| 22    | thioanisole           | O <sub>2</sub> | MB           | EtOH               | rt         | 1                 | 0.00056      | 2                                 | 30             | 8         | 610 (50)                   | -3              | 9.9             |                 |
| 23    | thioanisole           | O <sub>2</sub> | MB           | EtOH               | rt         | 1                 | 0.00056      | 2                                 | 35             | 8         | 610 (50)                   | -2              | 9.8             |                 |
| 24    | thioanisole           | O <sub>2</sub> | MB           | EtOH               | rt         | 1                 | 0.00056      | 1.5                               | 10             | 8         | 610 (50)                   | -5              | 14.6            |                 |
| 25    | thioanisole           | O <sub>2</sub> | MB           | EtOH               | rt         | 1                 | 0.00056      | 2                                 | 10             | 8         | 610 (50)                   | -4              | 10.9            |                 |
| 26    | thioanisole           | O <sub>2</sub> | MB           | EtOH               | rt         | 1                 | 0.00056      | 1                                 | 15             | 8         | 610 (50)                   | -4              | 19.8            |                 |
| 27    | thioanisole           | O <sub>2</sub> | MB           | EtOH               | rt         | 1                 | 0.00056      | 1.5                               | 20             | 8         | 610 (60)                   | -3              | 16.7            |                 |
| 28    | thioanisole           | O <sub>2</sub> | MB           | EtOH               | rt         | 1                 | 0.00056      | 1.5                               | 20             | 8         | 610 (70)                   | -3              | 21.9            |                 |
| 29    | thioanisole           | O <sub>2</sub> | MB           | EtOH               | rt         | 1                 | 0.00056      | 1.5                               | 20             | 8         | 610 (80)                   | -3              | 23.9            |                 |
| 30    | thioanisole           | O <sub>2</sub> | MB           | EtOH               | rt         | 1                 | 0.00056      | 1.5                               | 20             | 8         | 610 (90)                   | -3              | 32.8            |                 |
| 31    | thioanisole           | O <sub>2</sub> | MB           | EtOH               | rt         | 1                 | 0.00056      | 1.5                               | 20             | 8         | 610 (100)                  | -3              | 35.8            |                 |
| 32    | thioanisole           | O <sub>2</sub> | MB           | EtOH               | rt         | 1                 | 0.00056      | 1                                 | 50             | 8         | 610 (50)                   | -2              | 15.5            |                 |
| 33    | thioanisole           | O <sub>2</sub> | MB           | EtOH               | rt         | 1                 | 0.00056      | 1                                 | 50             | 8         | 610 (50)                   | -2              | 3.4             |                 |
| 34    | thioanisole           | O <sub>2</sub> | MB           | EtOH               | rt         | 1                 | 0.00056      | 1                                 | 15             | 8         | 610 (50)                   | -4              | 3.4             |                 |
| 35    | thioanisole           | O <sub>2</sub> | MB           | EtOH               | rt         | 1                 | 0.00056      | 1.5                               | 15             | 8         | 610 (50)                   | -4              | 2.6             |                 |
| 36    | thioanisole           | O <sub>2</sub> | MB           | EtOH               | rt         | 1                 | 0.00056      | 2                                 | 15             | 8         | 610 (50)                   | -3              | 2.2             |                 |
| 37    | thioanisole           | O <sub>2</sub> | RB           | EtOH               | rt         | 1                 | 0.00056      | 1                                 | 50             | 8         | 532 (50)                   | -2              | 9.2             |                 |
| 38    | thioanisole           | O <sub>2</sub> | RB           | EtOH               | rt         | 1                 | 0.00056      | 1                                 | 15             | 8         | 532 (50)                   | -4              | 3.7             |                 |
| 39    | thioanisole           | O <sub>2</sub> | RB           | EtOH               | rt         | 1                 | 0.00056      | 1.5                               | 15             | 8         | 532 (50)                   | -4              | 10.4            |                 |
| 40    | thioanisole           | O <sub>2</sub> | RB           | EtOH               | rt         | 1                 | 0.00056      | 2                                 | 15             | 8         | 532 (50)                   | -3              | 10.9            |                 |
| 41    | thioanisole           | O <sub>2</sub> | MB           | EtOH               | rt         | 1                 | 0.00056      | 1                                 | 15             | 8         | 610 (100)                  | -4              | 43.9            |                 |
| 42    | thioanisole           | O <sub>2</sub> | MB           | EtOH               | rt         | 1                 | 0.00056      | 0.5                               | 10             | 8         | 610 (50)                   | -7              | 61.2            |                 |
| 43    | thioanisole           | O <sub>2</sub> | MB           | EtOH               | rt         | 1                 | 0.00056      | 0.5                               | 15             | 8         | 610 (50)                   | -6              | 40.8            |                 |
| 44    | thioanisole           | O <sub>2</sub> | MB           | EtOH               | rt         | 1                 | 0.00056      | 0.5                               | 10             | 8         | 610 (100)                  | -7              | 88.8            |                 |
| 45    | thioanisole           | O <sub>2</sub> | MB           | EtOH               | rt         | 1                 | 0.0056       | 0.5                               | 10             | 8         | 610 (50)                   | -7              | 25.9            |                 |
| 46    | thioanisole           | O <sub>2</sub> | MB           | EtOH               | rt         | 1                 | 0.0056       | 1                                 | 15             | 8         | 610 (50)                   | -4              | 25.6            |                 |
| 47    | thioanisole           | O <sub>2</sub> | MB           | EtOH               | rt         | 1                 | 0.0056       | 1.5                               | 15             | 8         | 610 (50)                   | -4              | 15.05           |                 |
| 48    | thioanisole           | O <sub>2</sub> | MB           | EtOH               | rt         | 1                 | 0.0056       | 2                                 | 15             | 8         | 610 (50)                   | -4              | 11.6            |                 |
| 49    | thioanisole           | O <sub>2</sub> | MB           | EtOH               | rt         | 1                 | 0.000056     | 0.5                               | 10             | 8         | 610 (50)                   | -6              | 6.7             |                 |
| 50    | thioanisole           | O <sub>2</sub> | MB           | EtOH               | rt         | 1                 | 0.00056      | 0.5                               | 10             | 9         | 610 (50)                   | -10             | N.D             |                 |
| 51    | thioanisole           | O <sub>2</sub> | MB           | EtOH               | rt         | 1                 | 0.00056      | 0.5                               | 10             | 7         | 610 (50)                   | -6              | 45.4            |                 |
| 52    | thioanisole           | O <sub>2</sub> | MB           | EtOH               | rt         | 1                 | 0.00056      | 0.5                               | 10             | 9         | 610 (50)                   | -10             | 94.0            |                 |
| 53    | thioanisole           | O <sub>2</sub> | MB           | EtOH               | rt         | 1                 | 0.00056      | 0.5                               | 10             | 9         | 610 (50)                   | -10             | 94.8            |                 |
| 54    | thioanisole           | O <sub>2</sub> | MB           | EtOH               | rt         | 1                 | 0.00056      | 0.5                               | 10             | 9         | 610 (80)                   | -10             | 66.2            |                 |
| 55    | thioanisole           | O <sub>2</sub> | MB           | EtOH               | rt         | 1                 | 0.001        | 0.5                               | 10             | 9         | 610 (50)                   | -10             | 33.9            |                 |
| 56    | thioanisole           | O <sub>2</sub> | MB           | EtOH               | rt         | 1                 | 0.001        | 0.5                               | 10             | 9         | 610 (50)                   | -10             | 39.1            |                 |
| 57    | thioanisole           | O <sub>2</sub> | MB           | EtOH               | rt         | 1                 | 0.001        | 0.5                               | 10             | 9         | 610 (60)                   | -10             | 72.8            |                 |
| 58    | thioanisole           | O <sub>2</sub> | MB           | EtOH               | rt         | 1                 | 0.00056      | 0.5                               | 10             | 9         | 610 (70)                   | -10             | 99.4            |                 |
| 59    | thioanisole           | O <sub>2</sub> | MB           | EtOH               | rt         | 1                 | 0.00056      | 0.5                               | 10             | 9         | 610 (70)                   | -10             | 93.2            |                 |
| 60    | thioanisole           | O <sub>2</sub> | MB           | EtOH               | rt         | 1                 | 0.00056      | 0.5                               | 10             | 9         | 610 (70)                   | -10             | total           |                 |
| 61    | thioanisole           | O <sub>2</sub> | MB           | EtOH               | rt         | 1                 | 0.00056      | 0.5                               | 10             | 9         | 610 (70)                   | -10             | 97.6            |                 |
| 62    | benzyl methyl sulfide | O <sub>2</sub> | MB           | EtOH               | rt         | 1                 | 0.00056      | 0.5                               | 10             | 9         | 610 (50)                   | -10             | total           |                 |
| 63    | benzyl methyl sulfide | O <sub>2</sub> | MB           | EtOH               | t          | 1                 | 0.00056      | 0.5                               | 10             | 9         | 610 (60)                   | -10             | total           |                 |
| 64    | benzyl methyl sulfide | O <sub>2</sub> | MB           | EtOH               | rt         | 1                 | 0.00056      | 0.5                               | 10             | 9         | 610 (80)                   | -10             | total           |                 |
| 65    | benzyl methyl sulfide | O <sub>2</sub> | MB           | EtOH               | rt         | 1                 | 0.00056      | 0.5                               | 10             | 9         | 610 (70)                   | -10             | total           |                 |
| 66    | tetrathioephene       | O <sub>2</sub> | MB           | EtOH               | rt         | 1                 | 0.00056      | 0.5                               | 10             | 9         | 610 (60)                   | -10             | 94.8            |                 |
| 67    | tetrathioephene       | O <sub>2</sub> | MB           | EtOH               | rt         | 1                 | 0.00056      | 0.5                               | 10             | 9         | 610 (80)                   | -10             | 97.6            | 97.0            |
| 68    | tetrathioephene       | O <sub>2</sub> | MB           | EtOH               | rt         | 1                 | 0.00056      | 0.5                               | 10             | 9         | 610 (70)                   | -10             | total           |                 |
| 69    | dipropylsulfide       | O <sub>2</sub> | MB           | EtOH               | rt         | 1                 | 0.00056      | 0.5                               | 10             | 9         | 610 (80)                   | -10             | total           | 97.2            |
| 70    | dipropylsulfide       | O <sub>2</sub> | MB           | EtOH               | rt         | 1                 | 0.00056      | 0.5                               | 10             | 9         | 610 (70)                   | -10             | total           | 92.5            |
| 71    | diphenyl sulfide      | O <sub>2</sub> | MB           | EtOH               | rt         | 1                 | 0.00056      | 0.5                               | 10             | 9         | 610 (70)                   | -10             | 6.2             |                 |
| 72    | diphenyl sulfide      | O <sub>2</sub> | MB           | EtOH               | rt         | 1                 | 0.00056      | 0.5                               | 10             | 9         | 610 (70)                   | -10             | 3.8             |                 |
| 73    | diphenyl sulfide      | O <sub>2</sub> | MB           | EtOH               | rt         | 1                 | 0.00056      | 0.5                               | 10             | 11        | 610 (70)                   | -10             | 6.0             |                 |
| 74    | diethyl sulfide       | O <sub>2</sub> | MB           | EtOH               | rt         | 1                 | 0.00056      | 0.5                               | 10             | 9         | 610 (70)                   | -10             | total           | 97.3            |
| 75    | dibenzothiophene      | O <sub>2</sub> | MB           | EtOH               | rt         | 1                 | 0.00056      | 0.5                               | 10             | 9         | 610 (70)                   | -10             | 0.0             |                 |
| 76    | Thiodipropionic acid  | O <sub>2</sub> | MB           | EtOH               | rt         | 1                 | 0.00056      | 0.5                               | 10             | 9         | 610 (70)                   | -10             | total           |                 |
| 77    | dibenzyl sulfide      | O <sub>2</sub> | MB           | EtOH/2-MeTHF (1:1) | rt         | 1                 | 0.00056      | 0.5                               | 10             | 9         | 610 (70)                   | -10             | clogged reactor |                 |
| 78    | dibenzyl sulfide      | O <sub>2</sub> | MB           | EtOH/2-MeTHF (1:1) | 60         | 0.1               | 0.00056      | 0.5                               | 10             | 9         | 610 (70)                   | -10             | total           | 63.9            |
| 79    | dibenzyl sulfide      | O <sub>2</sub> | MB           | EtOH/2-MeTHF (1:1) | 70         | 1                 | 0.00056      | 0.5                               | 10             | 9         | 610 (70)                   | -10             | total           | 60.5            |
| 80    | diphenyl sulfide      | O <sub>2</sub> | MB           | ACN/eau 85:15      | rt         | 1                 | 0.00056      | 0.5                               | 10             | 9         | 610 (70)                   | -10             | 0.0             |                 |
| 81    | diphenyl sulfide      | O <sub>2</sub> | MB           | ACN/eau 85:15      | rt         | 1                 | 0.00056      | 1.5                               | 20             | 11.6      | 610 (70)                   | -4              | 0.0             |                 |
| 87    | thioanisole           | air            | MB           | EtOH               | rt         | 1                 | 0.00056      | 0.5                               | 10             | 9         | 610 (70)                   | -10             | 21.5            |                 |
| 88    | thioanisole           | air            | MB           | EtOH               | rt         | 1                 | 0.00056      | 0.5                               | 10             | 9         | 610 (70)                   | -10             | 19.3            |                 |
| 89    | thioanisole           | air            | MB           | EtOH               | rt         | 1                 | 0.00056      | 1                                 | 20             | 9         | 610 (70)                   | -4              | 15.6            |                 |
| 90    | thioanisole           | air            | MB           | EtOH               | rt         | 1                 | 0.00056      | 1                                 | 20             | 9         | 610 (70)                   | -4              | 15.3            |                 |
| 91    | thioanisole           | air            | MB           | EtOH               | rt         | 0.1               | 0.000056     | 0.5                               | 10             | 9         | 610 (70)                   | -10             | total           |                 |
| 92    | thioanisole           | air            | MB           | EtOH               | rt         | 0.1               | 0.000056     | 0.5                               | 10             | 9         | 610 (70)                   | -10             | total           |                 |
| 93    | thioanisole           | air            | MB           | EtOH               | rt         | 0.1               | 0.000056     | 1.5                               | 30             | 5         | 610 (70)                   | -2              | 46.7            |                 |
| 94    | thioanisole           | air            | MB           | EtOH               | rt         | 0.1               | 0.000056     | 1.5                               | 30             | 5         | 610 (70)                   | -2              | 46.3            |                 |

Table S3. General table of oxidation tests (part 2). Selectivity is only specified when not total toward the sulfoxide.

| n°exp | Substrate        | Oxidant        | Photosensib. | Solvent | Temp. (°C) | Concentration (M) |              | Flow rate (mL.min <sup>-1</sup> ) |                | BPR (bar) | Light (nm) (Intensity (%)) | Res. Time (min) | Conversion (%) | Selectivity (%) |
|-------|------------------|----------------|--------------|---------|------------|-------------------|--------------|-----------------------------------|----------------|-----------|----------------------------|-----------------|----------------|-----------------|
|       |                  |                |              |         |            | Substrate         | Photosensib. | Substrate                         | O <sub>2</sub> |           |                            |                 |                |                 |
| 95    | propylS          | air            | MB           | EtOH    | rt         | 0.1               | 0.000056     | 0.5                               | 10             | 9         | 610 (70)                   | -10             | total          |                 |
| 96    | propylS          | air            | MB           | EtOH    | rt         | 0.1               | 0.000056     | 0.5                               | 10             | 9         | 610 (70)                   | -10             | total          |                 |
| 97    | diphenyl sulfide | O <sub>2</sub> | MB           | ACN     | rt         | 0.1               | 0.00056      | 0.5                               | 10             | 9         | 610 (70)                   | -10             | 0.0            |                 |
| 98    | diphenyl sulfide | O <sub>2</sub> | MB           | ACN     | rt         | 0.1               | 0.00056      | 0.5                               | 10             | 9         | 610 (70)                   | -10             | 0.0            |                 |
| 99    | diphenyl sulfide | O <sub>2</sub> | DCA          | ACN     | rt         | 0.1               | 0.000056     | 0.5                               | 10             | 9         | 395 (100)                  | -10             | N.D            |                 |
| 100   | diphenyl sulfide | O <sub>2</sub> | DCA          | ACN     | rt         | 0.1               | 0.000056     | 0.5                               | 10             | 9         | 395 (70)                   | -10             | 46.6           |                 |
| 101   | dibenzothiophene | O <sub>2</sub> | DCA          | MeCN    | rt         | 0.1               | 0.000056     | 0.5                               | 10             | 9         | 395 (100)                  | -10             | 20.1           | 12.5            |
| 102   | dibenzothiophene | O <sub>2</sub> | DCA          | MeCN    | rt         | 0.1               | 0.000056     | 0.5                               | 10             | 9         | 395 (70)                   | -10             | 22.7           | 7.9             |
| 103   | dibenzothiophene | O <sub>2</sub> | DCA          | MeCN    | rt         | 0.1               | 0.00056      | 0.5                               | 10             | 9         | 395 (100)                  | -10             | 48.9           | 20.3            |
| 104   | dibenzothiophene | O <sub>2</sub> | DCA          | MeCN    | rt         | 0.1               | 0.00056      | 0.5                               | 10             | 9         | 395 (70)                   | -10             | 47.8           | 17.2            |
| 105   | dibenzyl sulfide | O <sub>2</sub> | DCA          | MeCN    | rt         | 0.1               | 0.00056      | 0.5                               | 10             | 9         | 395 (100)                  | -10             | total          | 19.0            |
| 106   | dibenzyl sulfide | O <sub>2</sub> | DCA          | MeCN    | rt         | 0.1               | 0.00056      | 0.5                               | 10             | 9         | 395 (70)                   | -10             | total          | 21.2            |
| 107   | CEES             | O <sub>2</sub> | MB           | EtOH    | rt         | 1                 | 0.00056      | 0.5                               | 10             | 9         | 610 (100)                  | -10             | 99.92          | 94.8            |
| 108   | CEES             | O <sub>2</sub> | MB           | EtOH    | rt         | 1                 | 0.00056      | 0.5                               | 10             | 9         | 610 (70)                   | -10             | 99.92          | 95.5            |
| 109   | CEES             | O <sub>2</sub> | MB           | EtOH    | rt         | 1                 | 0.00056      | 1                                 | 20             | 9         | 610 (100)                  | -4              | 99.26          | 92.4            |
| 110   | CEES             | Air            | MB           | EtOH    | rt         | 1                 | 0.00056      | 0.5                               | 10             | 9         | 610 (100)                  | -10             | 99.74          | 84.0            |
| 111   | CEES             | Air            | MB           | EtOH    | rt         | 0.1               | 0.000056     | 0.5                               | 10             | 9         | 610 (100)                  | -10             | 99.88          | 84.8            |
| 112   | CEES             | Air            | MB           | EtOH    | rt         | 0.1               | 0.000056     | 0.5                               | 10             | 9         | 610 (70)                   | -10             | total          | 83.4            |
| 113   | CEES             | Air            | RB           | EtOH    | rt         | 0.1               | 0.000056     | 0.5                               | 10             | 9         | 530 (100)                  | -10             | 83.69          | 83.4            |
| 114   | CEES             | Air            | RB           | EtOH    | rt         | 0.1               | 0.000056     | 0.5                               | 10             | 9         | 530 (70)                   | -10             | 80.94          | 79.5            |
| 115   | CEES             | O <sub>2</sub> | RB           | EtOH    | rt         | 1                 | 0.00056      | 0.5                               | 10             | 9         | 530 (70)                   | -10             | 94.51          | 97.3            |
| 116   | CEES             | O <sub>2</sub> | MB           | EtOH    | rt         | 1                 | 0.00056      | 0.5                               | 10             | 9         | white light (100)          | -10             | 99.91          | 96.1            |
| 117   | CEES             | O <sub>2</sub> | RB           | EtOH    | rt         | 1                 | 0.00056      | 0.5                               | 10             | 9         | white light (100)          | -10             | 99.92          | 95.4            |
| 118   | CEES             | O <sub>2</sub> | MB           | EtOH    | rt         | 1                 | 0.00056      | 2                                 | 40             | 9         | 610 (100)                  | -2              | 81.88          | 95.3            |
| 119   | CEES             | Air            | MB           | EtOH    | rt         | 1                 | 0.00056      | 1                                 | 20             | 9         | 610 (100)                  | -4              | 51.42          | 74.0            |
| 120   | CEES             | O <sub>2</sub> | MB           | EtOH    | rt         | 1                 | 0.00056      | 1                                 | 20             | 9         | white light (100)          | -4              | total          | 97.8            |
| 121   | CEES             | Air            | MB           | EtOH    | rt         | 1                 | 0.00056      | 1                                 | 20             | 9         | white light (100)          | -4              | 68.23          | 93.5            |
| 122   | CEPS             | O <sub>2</sub> | MB           | EtOH    | rt         | 1                 | 0.00056      | 1                                 | 20             | 9         | 610 (100)                  | -4              | 58.0           | 97.6            |
| 123   | CEPS             | O <sub>2</sub> | MB           | EtOH    | rt         | 1                 | 0.00056      | 0.5                               | 10             | 9         | 610 (100)                  | -10             | 57.8           | 97.6            |
| 124   | CEPS             | O <sub>2</sub> | MB           | EtOH    | rt         | 0.1               | 0.000056     | 1                                 | 20             | 9         | 610 (100)                  | -4              | 65.4           | 98.1            |
| 125   | CEPS             | O <sub>2</sub> | MB           | EtOH    | rt         | 0.1               | 0.000056     | 0.5                               | 10             | 9         | 610 (100)                  | -10             | 93.11          | 99.9            |
| 126   | CEPS             | O <sub>2</sub> | MB           | EtOH    | rt         | 0.1               | 0.000056     | 0.5                               | 10             | 10        | white light (100)          | -10             | 74.7           | 99.99           |

## 3.2 CEES photooxidation tests

### 3.2.1 Impact of the residence time

Table S4. Comparison of residence time for the neutralization of **CEES**. PS is always MB when not specified, Rose Bengal when (RB) is specified.

| In Table 3 | [CEES] (M) | [PS] (μM) | Oxidant        | Flow rate (mL.min <sup>-1</sup> ) |     | BPR (bar) | Light (nm) (Intensity (%)) | Res. time (min) | Conversion (%) | Selectivity (%) |
|------------|------------|-----------|----------------|-----------------------------------|-----|-----------|----------------------------|-----------------|----------------|-----------------|
|            |            |           |                | Liquid                            | Gas |           |                            |                 |                |                 |
| Entry 1    | 1          | 560       | O <sub>2</sub> | 0.5                               | 10  | 9         | 610 (100)                  | -10             | 99.92          | 94.8            |
| Entry 6    | 1          | 560       | O <sub>2</sub> | 1                                 | 20  | 9         | 610 (100)                  | -4              | 99.26          | 92.4            |
| Entry 10   | 1          | 560       | O <sub>2</sub> | 2                                 | 40  | 9         | 610 (100)                  | -2              | 81.88          | 95.3            |

### 3.2.2 Comparison of oxygen and air

Table S5. Comparison of oxidant gas for the neutralization of **CEES**. PS is always MB when not specified, Rose Bengal when (RB) is specified.

| In Table 3 | [CEES] (M) | [PS] (μM) | Oxidant        | Flow rate (mL.min <sup>-1</sup> ) |     | BPR (bar) | Light (nm) (Intensity (%)) | Res. time (min) | Conversion (%) | Selectivity (%) |
|------------|------------|-----------|----------------|-----------------------------------|-----|-----------|----------------------------|-----------------|----------------|-----------------|
|            |            |           |                | Liquid                            | Gas |           |                            |                 |                |                 |
| Entry 1    | 1          | 560       | O <sub>2</sub> | 0.5                               | 10  | 9         | 610 (100)                  | -10             | 99.92          | 94.8            |
| Entry 4    | 1          | 560       | Air            | 0.5                               | 10  | 9         | 610 (100)                  | -10             | 99.74          | 84              |
| Entry 6    | 1          | 560       | O <sub>2</sub> | 1                                 | 20  | 9         | 610 (100)                  | -4              | 99.26          | 92.4            |
| Entry 7    | 1          | 560       | Air            | 1                                 | 20  | 9         | 610 (100)                  | -4              | 51.42          | 74              |
| entry 8    | 1          | 560       | O <sub>2</sub> | 1                                 | 20  | 9         | white light (100)          | -4              | total          | 97.8            |
| Entry 9    | 1          | 560       | Air            | 1                                 | 20  | 9         | white light (100)          | -4              | 68.23          | 93.5            |

### 3.2.3 Comparison of photosensitizers

Table S6. Comparison of photosensitizers for **CEES** oxidation. PS is always MB when not specified, Rose Bengal when (RB) is specified.

| In Table 3  | [CEES] (M) | [PS] ( $\mu$ M) | Oxidant        | Flow rate ( $\text{mL}\cdot\text{min}^{-1}$ ) |     | BPR (bar) | Light (nm) (Intensity (%)) | Res. time (min) | Conversion (%) | Selectivity (%) |
|-------------|------------|-----------------|----------------|-----------------------------------------------|-----|-----------|----------------------------|-----------------|----------------|-----------------|
|             |            |                 |                | Liquid                                        | Gas |           |                            |                 |                |                 |
| not shown 1 | 1          | 560             | O <sub>2</sub> | 0.5                                           | 10  | 9         | 610 (70)                   | -10             | 99.92          | 95.5            |
| not shown 2 | 1          | 560 (RB)        | O <sub>2</sub> | 0.5                                           | 10  | 9         | 530 (70)                   | -10             | 94.51          | 97.3            |
| Entry 5     | 0.1        | 56              | Air            | 0.5                                           | 10  | 9         | 610 (100)                  | -10             | 99.88          | 84.8            |
| not shown 3 | 0.1        | 56 (RB)         | Air            | 0.5                                           | 10  | 9         | 530 (100)                  | -10             | 83.69          | 83.4            |
| Entry 2     | 1          | 560             | O <sub>2</sub> | 0.5                                           | 10  | 9         | white light (100)          | -10             | 99.91          | 96.1            |
| Entry 3     | 1          | 560 (RB)        | O <sub>2</sub> | 0.5                                           | 10  | 9         | white light (100)          | -10             | 99.92          | 95.4            |

### 3.2.4 Comparison of light (wavelength and intensity)

Table S7. Comparison of light for **CEES** oxidation. PS is always MB when not specified, Rose Bengal when (RB) is specified.

| In Table 3  | [CEES] (M) | [PS] ( $\mu$ M) | Oxidant        | Flow rate ( $\text{mL}\cdot\text{min}^{-1}$ ) |     | BPR (bar) | Light (nm) (Intensity (%)) | Res. time (min) | Conversion (%) | Selectivity (%) |
|-------------|------------|-----------------|----------------|-----------------------------------------------|-----|-----------|----------------------------|-----------------|----------------|-----------------|
|             |            |                 |                | Liquid                                        | Gas |           |                            |                 |                |                 |
| Entry 1     | 1          | 560             | O <sub>2</sub> | 0.5                                           | 10  | 9         | 610 (100)                  | -10             | 99.92          | 94.8            |
| not shown 1 | 1          | 560             | O <sub>2</sub> | 0.5                                           | 10  | 9         | 610 (70)                   | -10             | 99.92          | 95.5            |
| Entry 2     | 1          | 560             | O <sub>2</sub> | 0.5                                           | 10  | 9         | white light (100)          | -10             | 99.91          | 96.1            |
| Entry 6     | 1          | 560             | O <sub>2</sub> | 1                                             | 20  | 9         | 610 (100)                  | -4              | 99.26          | 92.4            |
| Entry 8     | 1          | 560             | O <sub>2</sub> | 1                                             | 20  | 9         | white light (100)          | -4              | total          | 97.8            |
| Entry 5     | 0.1        | 56              | Air            | 0.5                                           | 10  | 9         | 610 (100)                  | -10             | 99.88          | 84.8            |
| not shown 4 | 0.1        | 56              | Air            | 0.5                                           | 10  | 9         | 610 (70)                   | -10             | total          | 83.4            |
| not shown 3 | 0.1        | 56 (RB)         | Air            | 0.5                                           | 10  | 9         | 530 (100)                  | -10             | 83.69          | 83.4            |
| not shown 5 | 0.1        | 56 (RB)         | Air            | 0.5                                           | 10  | 9         | 530 (70)                   | -10             | 80.94          | 79.5            |
| not shown 2 | 1          | 560 (RB)        | O <sub>2</sub> | 0.5                                           | 10  | 9         | 530 (70)                   | -10             | 94.51          | 97.3            |
| Entry 3     | 1          | 560 (RB)        | O <sub>2</sub> | 0.5                                           | 10  | 9         | white light (100)          | -10             | 99.92          | 95.4            |
| Entry 7     | 1          | 560             | Air            | 1                                             | 20  | 9         | 610 (100)                  | -4              | 51.42          | 74              |
| Entry 9     | 1          | 560             | Air            | 1                                             | 20  | 9         | white light (100)          | -4              | 68.23          | 93.5            |

#### 4. Computations

##### 4.1 Stationary points for compounds **CEES**, **HD** and **1a-f**

| <b>CEES</b>                                                                                                                                                                                                                                                                                                                                                                                                                                                                                                                                   | <b>MP2/6-31+G** (Hartree)</b>                                                                                                |
|-----------------------------------------------------------------------------------------------------------------------------------------------------------------------------------------------------------------------------------------------------------------------------------------------------------------------------------------------------------------------------------------------------------------------------------------------------------------------------------------------------------------------------------------------|------------------------------------------------------------------------------------------------------------------------------|
| 15<br>scf done: -1014.569720<br>S 0.000000 0.000000 0.000000<br>C 0.000000 0.000000 1.792323<br>C 1.778165 0.000000 -0.253799<br>C -1.418766 0.077061 2.322684<br>C 2.091289 -0.114762 -1.733662<br>Cl 3.863064 -0.185112 -1.939820<br>H 0.611517 0.833668 2.134774<br>H 0.479444 -0.958472 2.040217<br>H -1.897513 1.018484 2.068487<br>H -2.018943 -0.753796 1.961510<br>H 2.125054 -0.881495 0.298219<br>H 2.182014 0.912821 0.181894<br>H 1.679041 -1.029718 -2.149896<br>H 1.729914 0.743979 -2.292796<br>H -1.389099 0.008742 3.390088  | H = -1014.432024<br>G = -1014.476153<br>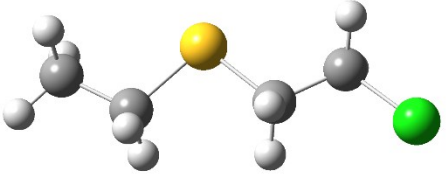   |
| <b>HD</b>                                                                                                                                                                                                                                                                                                                                                                                                                                                                                                                                     | <b>MP2/6-31+G** (Hartree)</b>                                                                                                |
| 15<br>scf done: -1473.592520<br>S 0.000000 0.000000 0.000000<br>C 0.000000 0.000000 1.820206<br>C 1.804791 0.000000 -0.236227<br>C 2.110725 -0.346458 -1.679465<br>Cl 3.880480 -0.306183 -1.959382<br>C -1.388127 0.359382 2.310690<br>Cl -1.437711 0.315289 4.101684<br>H 0.717538 0.740596 2.173039<br>H 0.290074 -0.982675 2.190699<br>H -1.664799 1.365389 2.008006<br>H -2.133454 -0.347168 1.954439<br>H 2.246850 -0.747053 0.422788<br>H 2.210736 0.980069 0.012172<br>H 1.771139 -1.348830 -1.924631<br>H 1.663803 0.368500 -2.365524 | H = -1473.462357<br>G = -1473.509951<br> |
| <b>1a</b>                                                                                                                                                                                                                                                                                                                                                                                                                                                                                                                                     | <b>MP2/6-31+G** (Hartree)</b>                                                                                                |
| 21<br>scf done: -633.914467<br>S 0.000000 0.000000 0.000000<br>C 0.000000 0.000000 1.540000<br>C 1.451926 0.000000 -0.513333<br>C -1.451926 0.000025 2.053333<br>C 1.451926 -0.000634 -2.053333                                                                                                                                                                                                                                                                                                                                               | H = -633.708181<br>G = -633.756180                                                                                           |



|                                                                                                                                                                                                                                                                                                                                                                                                                                                                                                                                                  |                                                                                                                            |
|--------------------------------------------------------------------------------------------------------------------------------------------------------------------------------------------------------------------------------------------------------------------------------------------------------------------------------------------------------------------------------------------------------------------------------------------------------------------------------------------------------------------------------------------------|----------------------------------------------------------------------------------------------------------------------------|
| C 2.903849 0.002154 -2.566668<br>C -1.451926 0.000025 3.593333<br>H 3.410060 -0.870298 -2.209628<br>H 3.406441 0.877001 -2.210375<br>H 2.903849 0.001696 -3.636668<br>H 0.945720 0.871827 -2.410359<br>H 0.949329 -0.875471 -2.409640<br>H 1.956202 0.873871 -0.157026<br>H 1.956456 -0.873431 -0.156307<br>H 0.504418 0.873643 1.896667<br>H 0.504388 -0.873660 1.896667<br>H -1.956344 -0.873617 1.696667<br>H -1.956314 0.873685 1.696667<br>H -0.947508 0.873668 3.950000<br>H -2.460732 0.000043 3.950000<br>H -0.947538 -0.873635 3.950000 | 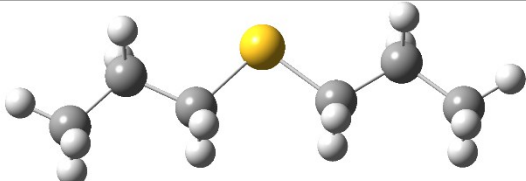                                         |
| <b>1b</b>                                                                                                                                                                                                                                                                                                                                                                                                                                                                                                                                        | <b>MP2/6-31+G** (Hartree)</b>                                                                                              |
| 12<br>scf done: -975.379095<br>S 0.000000 0.000000 0.000000<br>C 0.000000 0.000000 1.818307<br>C 1.799460 0.000000 -0.265304<br>C -1.424972 0.088353 2.345894<br>H 0.584580 0.852002 2.166642<br>H 0.479485 -0.914758 2.168073<br>H -1.906056 1.011875 2.026113<br>H -2.025321 -0.752543 1.999923<br>H 2.254083 -0.717680 0.417964<br>H 2.208892 0.989390 -0.062891<br>H -1.412332 0.070800 3.435348<br>Cl 2.135823 -0.470131 -1.927662                                                                                                          | H = -975.272292<br>G = -975.314752<br> |
| <b>1c</b>                                                                                                                                                                                                                                                                                                                                                                                                                                                                                                                                        | <b>MP2/6-31+G** (Hartree)</b>                                                                                              |
| 19<br>scf done: -668.343358<br>S -2.053586 -0.000084 -0.680770<br>C -3.684737 0.000088 0.102417<br>C -1.021695 -0.000008 0.821936<br>C 0.429459 -0.000008 0.436546<br>C 1.116949 -1.208986 0.251973<br>C 2.461562 -1.210638 -0.131914<br>C 3.138224 0.000028 -0.320319<br>C 2.461522 1.210676 -0.131948<br>C 1.116910 1.208989 0.251936<br>H -3.821623 -0.890355 0.713532<br>H -4.429205 0.000060 -0.691155<br>H -3.821512 0.890660 0.713367<br>H -1.257091 0.887812 1.411464<br>H -1.257086 -0.887764 1.411563                                  | H = -707.359079<br>G = -707.405066<br> |

|                                                                                                                                                                                                                                                                                                                                                                                                                                                                                                                                                                                                                                                                                                                                                |                                                                                                                            |
|------------------------------------------------------------------------------------------------------------------------------------------------------------------------------------------------------------------------------------------------------------------------------------------------------------------------------------------------------------------------------------------------------------------------------------------------------------------------------------------------------------------------------------------------------------------------------------------------------------------------------------------------------------------------------------------------------------------------------------------------|----------------------------------------------------------------------------------------------------------------------------|
| H 0.595190 -2.148260 0.401851<br>H 2.981818 -2.150839 -0.269979<br>H 4.180855 0.000040 -0.613839<br>H 2.981745 2.150892 -0.270040<br>H 0.595118 2.148249 0.401784                                                                                                                                                                                                                                                                                                                                                                                                                                                                                                                                                                              |                                                                                                                            |
| <b>1d</b>                                                                                                                                                                                                                                                                                                                                                                                                                                                                                                                                                                                                                                                                                                                                      | <b>MP2/6-31+G** (Hartree)</b>                                                                                              |
| 16<br>scf done: -668.343357<br>S 0.000000 0.000000 0.000000<br>C 0.000000 0.000000 1.782446<br>C 1.789167 0.000000 -0.300110<br>C 0.511104 -1.092331 2.501333<br>C 0.486722 -1.085431 3.898840<br>C -0.073107 -0.003484 4.588916<br>C -0.599080 1.077646 3.874408<br>C -0.558043 1.084222 2.475656<br>H 0.923556 -1.943237 1.971916<br>H 0.887379 -1.930398 4.445687<br>H -0.099439 -0.004497 5.671551<br>H -1.033777 1.918284 4.401491<br>H -0.950451 1.928941 1.922456<br>H 2.252006 0.873983 0.152735<br>H 1.931386 0.041215 -1.378688<br>H 2.251737 -0.907353 0.080207                                                                                                                                                                     | H = -668.204306<br>G = -668.246695<br>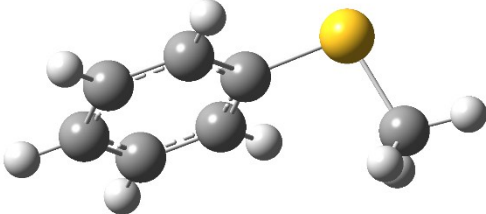   |
| <b>1e</b>                                                                                                                                                                                                                                                                                                                                                                                                                                                                                                                                                                                                                                                                                                                                      | <b>MP2/6-31+G** (Hartree)</b>                                                                                              |
| 23<br>scf done: -859.512841<br>S 0.000000 0.000000 0.000000<br>C 0.000000 0.000000 1.783633<br>C 1.760523 0.000000 -0.284007<br>C 2.568803 1.020720 0.241188<br>C 3.944685 1.011514 0.000690<br>C 4.517217 0.007196 -0.790861<br>C 3.707571 -0.996516 -1.331341<br>C 2.331385 -1.006744 -1.074285<br>C -0.838860 0.892889 2.464438<br>C -0.894860 0.871065 3.862937<br>C -0.111651 -0.034442 4.585381<br>C 0.728501 -0.923675 3.902836<br>C 0.770391 -0.924513 2.506508<br>H -1.427658 1.611064 1.906155<br>H -1.543407 1.565895 4.382645<br>H -0.148118 -0.043179 5.667647<br>H 1.333639 -1.632348 4.455451<br>H 1.411825 -1.622689 1.981196<br>H 2.124972 1.804515 0.844196<br>H 4.565503 1.796256 0.415988<br>H 5.583159 0.007845 -0.982002 | H = -859.318588<br>G = -859.371122<br> |

|                                                                                                                                                                                                                                                                                                                                                                                                                                                                                                                                                                                                                                                                                                                                       |                                                                                                                          |
|---------------------------------------------------------------------------------------------------------------------------------------------------------------------------------------------------------------------------------------------------------------------------------------------------------------------------------------------------------------------------------------------------------------------------------------------------------------------------------------------------------------------------------------------------------------------------------------------------------------------------------------------------------------------------------------------------------------------------------------|--------------------------------------------------------------------------------------------------------------------------|
| H 4.143571 -1.778185 -1.941561<br>H 1.706606 -1.796681 -1.473691                                                                                                                                                                                                                                                                                                                                                                                                                                                                                                                                                                                                                                                                      |                                                                                                                          |
| <b>1f</b>                                                                                                                                                                                                                                                                                                                                                                                                                                                                                                                                                                                                                                                                                                                             | <b>MP2/6-31+G** (Hartree)</b>                                                                                            |
| 21<br>sfc done: -858.3527375<br>S 0.000000 0.000000 0.000000<br>C 0.000000 0.000000 1.754929<br>C 1.754671 0.000000 -0.030842<br>C 2.557844 0.000000 -1.180068<br>C 3.943026 0.000000 -1.021781<br>C 4.522511 0.000000 0.262174<br>C 3.722322 0.000000 1.402038<br>C 2.321976 0.000000 1.265399<br>C 1.306029 0.000000 2.299326<br>C 1.467328 0.000000 3.697018<br>C 0.341788 0.000000 4.517234<br>C -0.952155 0.000000 3.960456<br>C -1.134810 0.000000 2.578280<br>H 5.600907 0.000000 0.362802<br>H 4.578977 0.000000 -1.898668<br>H 2.114729 0.000000 -2.168810<br>H 4.174636 0.000000 2.387342<br>H -2.131183 0.000000 2.152723<br>H -1.817686 0.000000 4.611781<br>H 0.461410 0.000000 5.593691<br>H 2.460476 0.000000 4.131761 | H = -858.185869<br>G = -858.231417<br>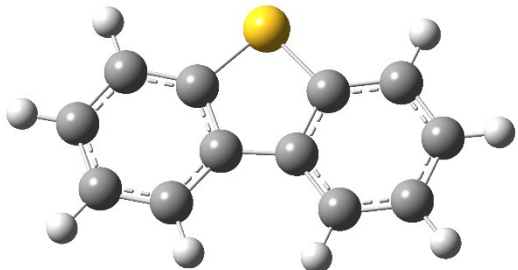 |

#### 4.2 Selected transition states, peroxysulfoxides and sulfoxides

|                                                                                                                                                                                                                                                                                                                                                                                                                                                                                                                                                                                         |                                                                                                                            |
|-----------------------------------------------------------------------------------------------------------------------------------------------------------------------------------------------------------------------------------------------------------------------------------------------------------------------------------------------------------------------------------------------------------------------------------------------------------------------------------------------------------------------------------------------------------------------------------------|----------------------------------------------------------------------------------------------------------------------------|
| <b>TS<sup>1</sup><sub>1a</sub></b>                                                                                                                                                                                                                                                                                                                                                                                                                                                                                                                                                      | <b>MP2/6-31+G** (Hartree)</b>                                                                                              |
| 23<br>scf done : -783.8306078<br>S 0.001090 -0.230173 -0.802643<br>C 1.371445 -0.560524 0.302297<br>C -1.368535 -0.567589 0.300751<br>O -0.003749 1.635150 -0.548470<br>O -0.007288 1.962681 0.769973<br>H 1.211938 0.151555 1.124357<br>H 1.256531 -1.580546 0.672130<br>H -1.253045 -1.590475 0.662164<br>H -1.209147 0.138421 1.127929<br>C 2.714263 -0.343585 -0.380861<br>H 2.815401 -1.024173 -1.228255<br>H 2.759935 0.675783 -0.768102<br>C -2.711302 -0.344919 -0.380645<br>H -2.754759 0.676224 -0.763369<br>H -2.814224 -1.021559 -1.230966<br>C 3.854936 -0.570112 0.607725 | H = -783.617775<br>G = -783.672039<br>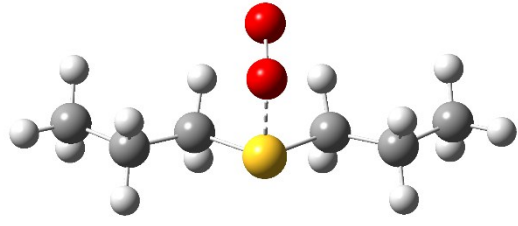 |

|                                                                                                                                                                                                                                                                                                                                                                                                                                                                                                                                                                                                                                                                                                                                                                                                                       |                                                                                                                            |
|-----------------------------------------------------------------------------------------------------------------------------------------------------------------------------------------------------------------------------------------------------------------------------------------------------------------------------------------------------------------------------------------------------------------------------------------------------------------------------------------------------------------------------------------------------------------------------------------------------------------------------------------------------------------------------------------------------------------------------------------------------------------------------------------------------------------------|----------------------------------------------------------------------------------------------------------------------------|
| H 4.817150 -0.413167 0.121601<br>H 3.781632 0.121402 1.447398<br>H 3.833986 -1.587507 0.999295<br>C -3.852298 -0.572873 0.607316<br>H -4.814169 -0.411296 0.121994<br>H -3.834290 -1.591904 0.994727<br>H -3.777135 0.114974 1.449864                                                                                                                                                                                                                                                                                                                                                                                                                                                                                                                                                                                 |                                                                                                                            |
| <b>1Aa</b>                                                                                                                                                                                                                                                                                                                                                                                                                                                                                                                                                                                                                                                                                                                                                                                                            | <b>MP2/6-31+G** (Hartree)</b>                                                                                              |
| 23<br>scf done: -705.4646392<br>S 0.000000 0.000000 0.000000<br>O 0.000000 0.000000 1.632804<br>O 1.372865 0.000000 2.142795<br>C 1.061157 1.390146 -0.429241<br>C 1.054479 -1.393613 -0.437150<br>C 0.467723 -2.699838 0.080800<br>C 0.420700 2.709889 -0.020802<br>H 2.007000 1.219826 0.083053<br>H 1.198791 1.320790 -1.510676<br>H -0.547928 2.819379 -0.512472<br>H 0.247740 2.704755 1.056036<br>H 2.036733 -1.192678 -0.013099<br>H 1.103495 -1.374989 -1.528368<br>H -0.538012 -2.839294 -0.320754<br>H 0.388104 -2.646164 1.166718<br>C 1.355687 -3.874880 -0.319864<br>H 0.942369 -4.808516 0.059741<br>H 1.433731 -3.953551 -1.404446<br>H 2.359631 -3.757324 0.088486<br>C 1.330023 3.877669 -0.393965<br>H 1.504217 3.908339 -1.469761<br>H 0.875846 4.821920 -0.096115<br>H 2.294371 3.791752 0.107114 | H = -705.310617<br>G = -705.355168<br>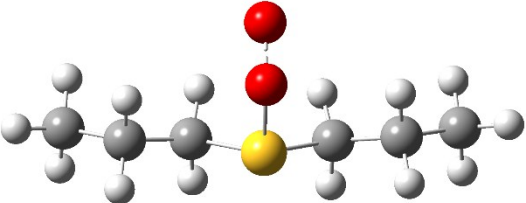   |
| <b>2a</b>                                                                                                                                                                                                                                                                                                                                                                                                                                                                                                                                                                                                                                                                                                                                                                                                             | <b>MP2/6-31+G** (Hartree)</b>                                                                                              |
| 23<br>scf done: -708.9285944<br>S 0.000000 0.000000 0.000000<br>O 0.000000 0.000000 1.632804<br>O 1.372865 0.000000 2.142795<br>C 1.061157 1.390146 -0.429241<br>C 1.054479 -1.393613 -0.437150<br>C 0.467723 -2.699838 0.080800<br>C 0.420700 2.709889 -0.020802<br>H 2.007000 1.219826 0.083053<br>H 1.198791 1.320790 -1.510676<br>H -0.547928 2.819379 -0.512472<br>H 0.247740 2.704755 1.056036<br>H 2.036733 -1.192678 -0.013099                                                                                                                                                                                                                                                                                                                                                                                | H = -708.717905<br>G = -708.766896<br> |

|                                                                                                                                                                                                                                                                                                                                                                                                                                                                                                                                                                                                               |                                                                                                                              |
|---------------------------------------------------------------------------------------------------------------------------------------------------------------------------------------------------------------------------------------------------------------------------------------------------------------------------------------------------------------------------------------------------------------------------------------------------------------------------------------------------------------------------------------------------------------------------------------------------------------|------------------------------------------------------------------------------------------------------------------------------|
| H 1.103495 -1.374989 -1.528368<br>H -0.538012 -2.839294 -0.320754<br>H 0.388104 -2.646164 1.166718<br>C 1.355687 -3.874880 -0.319864<br>H 0.942369 -4.808516 0.059741<br>H 1.433731 -3.953551 -1.404446<br>H 2.359631 -3.757324 0.088486<br>C 1.330023 3.877669 -0.393965<br>H 1.504217 3.908339 -1.469761<br>H 0.875846 4.821920 -0.096115<br>H 2.294371 3.791752 0.107114                                                                                                                                                                                                                                   |                                                                                                                              |
| <b>TS<sup>1</sup><sub>CEES</sub></b>                                                                                                                                                                                                                                                                                                                                                                                                                                                                                                                                                                          | <b>MP2/6-31+G** (Hartree)</b>                                                                                                |
| 17<br>scf done: -1164.482060<br>S 0.000000 0.000000 0.000000<br>C 0.000000 0.000000 1.789866<br>C 1.774045 0.000000 -0.283965<br>O -0.258618 1.826513 -0.186958<br>O 0.566664 2.535674 0.633915<br>C 2.085775 0.116971 -1.766937<br>C -1.415598 -0.099510 2.324229<br>Cl -1.369695 0.020003 4.105785<br>H 2.166592 -0.916977 0.155039<br>H 2.131050 0.866780 0.281900<br>H 1.688229 -0.726025 -2.329350<br>H 1.683864 1.041752 -2.176465<br>H 0.462901 0.967797 2.035413<br>H 0.627229 -0.821659 2.132371<br>H -2.029965 0.720006 1.960869<br>H -1.880032 -1.048909 2.073243<br>H 3.167516 0.132391 -1.890482 | H = -1164.337868<br>G = -1164.386512<br>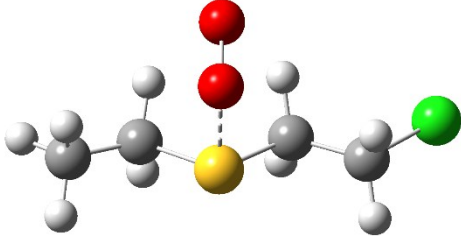  |
| <b>CEESOO</b>                                                                                                                                                                                                                                                                                                                                                                                                                                                                                                                                                                                                 | <b>MP2/6-31+G** (Hartree)</b>                                                                                                |
| 17<br>scf done: -1164.4888327<br>S 0.888064 -0.272016 -0.659449<br>O 0.999348 1.351888 -0.559551<br>O 0.774977 1.788057 0.819654<br>C -0.682107 -0.630748 0.156663<br>C 2.042211 -0.870504 0.588597<br>C 3.474415 -0.583499 0.166704<br>C -1.794041 0.138153 -0.531620<br>Cl -3.343617 -0.250641 0.265914<br>H 1.839625 -1.939456 0.671268<br>H 1.770784 -0.362256 1.511530<br>H 3.721778 -1.070824 -0.774761<br>H 3.643386 0.487130 0.071114<br>H -0.582742 -0.336324 1.198192<br>H -0.818441 -1.709080 0.067109                                                                                             | H = -1164.342699<br>G = -1164.391685<br> |

|                                                                                                                                                                                                                                                                                                                                                                                                                                                                                                                                                                                                                |                                                                                                                              |
|----------------------------------------------------------------------------------------------------------------------------------------------------------------------------------------------------------------------------------------------------------------------------------------------------------------------------------------------------------------------------------------------------------------------------------------------------------------------------------------------------------------------------------------------------------------------------------------------------------------|------------------------------------------------------------------------------------------------------------------------------|
| H -1.632012 1.207033 -0.435266<br>H -1.888347 -0.136564 -1.578951<br>H 4.140964 -0.966479 0.937524                                                                                                                                                                                                                                                                                                                                                                                                                                                                                                             |                                                                                                                              |
| <b>CEESO</b>                                                                                                                                                                                                                                                                                                                                                                                                                                                                                                                                                                                                   | <b>MP2/6-31+G** (Hartree)</b>                                                                                                |
| 16<br>scf done: -1089.5818305<br>S 0.000000 0.000000 0.000000<br>O 0.000000 0.000000 1.630775<br>C 1.757404 0.000000 -0.414364<br>C -0.433364 1.692868 -0.440747<br>C -1.883155 1.978776 -0.083066<br>C 2.426993 -1.197316 0.233266<br>Cl 4.156509 -1.201202 -0.210771<br>H -0.248817 1.761431 -1.513955<br>H 0.262301 2.328306 0.103370<br>H -2.565928 1.313874 -0.609142<br>H -2.044355 1.882773 0.988724<br>H 2.177967 0.933885 -0.050597<br>H 1.801083 -0.049989 -1.502941<br>H 2.363749 -1.128356 1.314601<br>H 1.999820 -2.135586 -0.110879<br>H -2.110621 3.003502 -0.371716                            | H = -1089.439828<br>G = -1089.485407<br>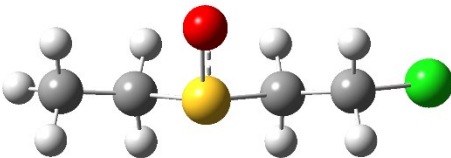   |
| <b>TS<sup>1</sup><sub>HD</sub></b>                                                                                                                                                                                                                                                                                                                                                                                                                                                                                                                                                                             | <b>MP2/6-31+G** (Hartree)</b>                                                                                                |
| 17<br>scf done: -1623.501380<br>S 0.000000 0.000000 0.000000<br>C 0.000000 0.000000 1.792322<br>C 1.778165 0.000000 -0.253799<br>O -0.221301 1.830609 -0.194652<br>O 0.635652 2.526376 0.604954<br>C 2.091289 0.114762 -1.733662<br>C -1.418767 -0.077036 2.322683<br>Cl -1.369262 0.036962 4.103784<br>H 2.182014 -0.912821 0.181894<br>H 2.125075 0.881481 0.298229<br>H 1.729914 -0.743979 -2.292796<br>H 1.679041 1.029718 -2.149896<br>H 0.479444 0.958472 2.040216<br>H 0.611517 -0.833669 2.134774<br>H -2.018930 0.753831 1.961509<br>H -1.897531 -1.018450 2.068487<br>Cl 3.863063 0.185112 -1.939820 | H = -1623.364778<br>G = -1623.416916<br> |
| <b>HDOO</b>                                                                                                                                                                                                                                                                                                                                                                                                                                                                                                                                                                                                    | <b>MP2/6-31+G** (Hartree)</b>                                                                                                |
| 17<br>scf done: -1623.5013185<br>S 0.000000 0.000000 0.000000                                                                                                                                                                                                                                                                                                                                                                                                                                                                                                                                                  | H = -1623.364796<br>G = -1623.417406                                                                                         |

|                                                                                                                                                                                                                                                                                                                                                                                                                                                                                                                                                                                     |                                                                                                                             |
|-------------------------------------------------------------------------------------------------------------------------------------------------------------------------------------------------------------------------------------------------------------------------------------------------------------------------------------------------------------------------------------------------------------------------------------------------------------------------------------------------------------------------------------------------------------------------------------|-----------------------------------------------------------------------------------------------------------------------------|
| C 0.000000 0.000000 1.792323<br>C 1.778164 0.000000 -0.253799<br>O -0.221301 -1.830611 -0.194652<br>O 0.635666 -2.526379 0.604936<br>C -1.418767 0.077036 2.322684<br>Cl -1.369262 -0.036962 4.103785<br>C 2.091287 -0.114737 -1.733664<br>Cl 3.863062 -0.185088 -1.939823<br>H 0.611503 0.833679 2.134775<br>H 0.479444 -0.958472 2.040217<br>H -1.897531 1.018450 2.068488<br>H -2.018930 -0.753831 1.961510<br>H 2.125053 -0.881495 0.298219<br>H 2.182016 0.912813 0.181910<br>H 1.679038 -1.029685 -2.149914<br>H 1.729915 0.744015 -2.292783                                  | 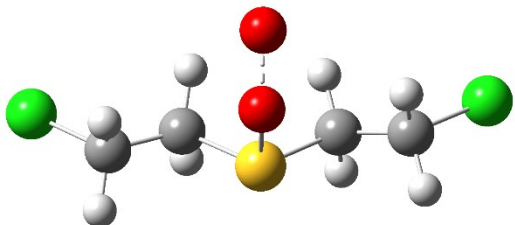                                          |
| <b>HDO</b>                                                                                                                                                                                                                                                                                                                                                                                                                                                                                                                                                                          | <b>MP2/6-31+G** (Hartree)</b>                                                                                               |
| 16<br>scf done: -1548.6024474<br>S 0.000000 0.000000 0.000000<br>C 0.000000 0.000000 1.818220<br>C 1.808010 0.000000 -0.187222<br>O -0.478699 -1.395541 -0.430838<br>C -1.427710 -0.105771 2.316231<br>Cl -1.443668 -0.130669 4.104558<br>C 2.155318 -0.116456 -1.658278<br>Cl 3.932253 -0.134343 -1.860394<br>H 0.464737 0.931059 2.145582<br>H 0.594233 -0.853590 2.147648<br>H -2.024582 0.746006 1.999767<br>H -1.892606 -1.026858 1.977126<br>H 2.198552 -0.848668 0.376037<br>H 2.179326 0.935341 0.233369<br>H 1.773842 -1.042852 -2.077579<br>H 1.774077 0.728807 -2.225859 | H = -1548.468056<br>G = -1548.517443<br> |

## References

- S1 Yangyang Liu, Ashlee J. Howarth, Joseph T. Hupp, and Omar K. Farha, *Angew.Chem. Int. Ed.*, **2015**, 54, 9001–9005
- S2 Bing Yu, An-Hua Liu, Liang-Nian He, Bin Li, Zhen-Feng Diao and Yu-Nong L, *Green Chem.*, **2012**, 14, 957 - 962.
- S3 Tomás Nevesely, Eva Svobodová, Josef Chudoba, Marek Sikorski, and Radek Cibulka, *Adv. Synth. Catal.*, **2016**, 358, 1654–1663.
- S4 Jitka Dad'ová, Eva Svobodová, Marek Sikorski, Burkhard König, and Radek Cibulka, *ChemCatChem.*, **2012**, 4, 620–623.
